# Supplementary material for: Outcomes of transplantation of livers from donation after circulatory death donors in the UK: a cohort study
Source: PubMed Central journal article supplement — BMJ Open. 2013 Sep 2;3(9):e003287. doi: 10.1136/bmjopen-2013-003287 (PMC3773642; doi:10.1136/bmjopen-2013-003287), 2013-09-02
Supplement: bmjopen-2013-003287.draft_revisions.pdf [file bmjopen-2013-003287.draft_revisions.pdf]

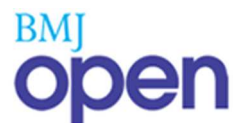

## Outcomes of transplantation of livers from donation after circulatory death donors in the UK

|                                 |                                                                                                                                                                        |
|---------------------------------|------------------------------------------------------------------------------------------------------------------------------------------------------------------------|
| Journal:                        | <i>BMJ Open</i>                                                                                                                                                        |
| Manuscript ID:                  | bmjopen-2013-003287                                                                                                                                                    |
| Article Type:                   | Research                                                                                                                                                               |
| Date Submitted by the Author:   | 22-May-2013                                                                                                                                                            |
| Complete List of Authors:       | Callaghan, Christopher<br>Charman, Susan<br>Muesan, Paolo<br>Powell, James<br>Gimson, Alexander<br>van der Meulen, Jan; London School of Hygiene and Tropical Medicine |
| <b>Primary Subject Heading</b>: | Gastroenterology and hepatology                                                                                                                                        |
| Secondary Subject Heading:      | Surgery, Gastroenterology and hepatology, Health services research                                                                                                     |
| Keywords:                       | Hepatobiliary surgery < SURGERY, Transplantation, EPIDEMIOLOGY, STATISTICS & RESEARCH METHODS                                                                          |
|                                 |                                                                                                                                                                        |

SCHOLARONE™  
Manuscripts

## Original article

# Outcomes of transplantation of livers from donation after circulatory death donors in the UK

Christopher J Callaghan<sup>1</sup>, Susan C Charman<sup>2,3</sup>, Paolo Muiesan<sup>4</sup>, James J Powell<sup>5</sup>, Alexander E Gimson<sup>1</sup>, Jan HP van der Meulen<sup>2,3</sup>, on behalf of the UK Liver Transplant Audit

22 May 2013

### Authors' affiliations

1. Cambridge Transplant Centre, Addenbrooke's Hospital, Cambridge, UK
2. Clinical Effectiveness Unit, Royal College of Surgeons of England, London, UK
3. Department of Health Services Research and Policy, London School of Hygiene and Tropical Medicine, London, UK
4. Department of Liver Transplantation and Hepatopancreatobiliary Surgery, Queen Elizabeth Hospital, Birmingham, UK
5. Scottish Liver Transplant Unit, Royal Infirmary of Edinburgh, Edinburgh, UK

### Corresponding author

Jan van der Meulen  
Professor of Clinical Epidemiology  
Department of Health Services Research and Policy  
London School of Hygiene and Tropical Medicine  
15 – 17 Tavistock Place  
London WC1H 9SH  
United Kingdom  
Email: [jan.vandermeulen@lshtm.ac.uk](mailto:jan.vandermeulen@lshtm.ac.uk)

**Key words:** liver transplantation, donation after circulatory death, mortality, graft loss

### Word count:

**Abstract:** 248

**Text:** 2917

**Tables:** 3

**Figures:** 2

## Abstract

### Background

Outcomes of liver transplantations from donation after circulatory death (DCD) donors may be inferior to those achieved with donation after brain death (DBD) donors. The impact of using DCD donors is likely to depend on specific national practices. We compared risk-adjusted graft loss and recipient mortality after transplantation of DCD and DBD livers in the UK.

### Method

Adults who received a first elective liver transplant between January 2005 and December 2010 were identified in the UK National Liver Transplant Database. Multivariable Cox regression and propensity score matching were used to estimate risk-adjusted hazard ratios (HR).

### Results

In total, 2572 liver transplants were identified with 352 (14%) from DCD donors. Three-year graft loss (95% CI) was higher with DCD livers (27.3%; 21.8% to 33.9%) than with DBD livers (18.2%; 16.4% to 20.2%). After adjustment with regression, the HR for graft loss was 2.3 (1.7 to 3.0). Similarly, three-year mortality was higher with DCD livers (19.4%; 14.5% - 25.6%) than with DBD livers (14.1%; 12.5% to 16.0%) with an adjusted HR of 2.0 (1.4 to 2.8). Propensity score matching gave similar results. Centre-specific adjusted HRs for graft loss and recipient mortality seemed to differ among transplant centres, although statistical evidence is weak (p-value for interaction 0.08 and 0.24, respectively).

### Conclusion

Graft loss and recipient mortality were about twice as high with DCD livers as with DBD livers in the UK. Outcomes after DCD liver transplantation may vary between centres. These results should inform policies for use of DCD livers.

## Article Summary

### Article focus

- There is increasing disparity between demand and supply of donor livers for transplantation.
- The use of livers from donation after circulatory death (DCD) donors – in addition to those from donation after brain death (DBD) - increases the donor pool.
- We compared graft loss and recipient mortality after transplantation of DCD and DBD livers in the UK.

### Key messages

- Recipients of DCD livers, after risk-adjustment, have approximately twice the risk of graft loss and death within 3 years of transplantation than recipients of livers from DBD donors.
- The impact of using DCD livers on graft loss and recipient mortality seemed to differ among the seven UK transplant centres.

### Strengths and limitations of this study

- A national database was used with near complete inclusion of all liver transplantations in the UK with high data quality and follow-up, which eliminates the risk of selective reporting.
- Both multivariable regression analysis and propensity score matching were used to adjust for differences risk factors for graft loss and patient mortality between DBD and DCD donors and recipients.
- We were not able to assess the impact that time from withdrawal of life-sustaining treatment to cardiac arrest has on post-transplant outcomes of DCD livers.

## Introduction

The increasing disparity between the demand and supply of donor livers is a major challenge. The need to increase the donor pool, and improve organ utilisation, has led to the re-introduction and rapid expansion of the use of livers from donation after circulatory death (DCD) donors. These donors have been classified as either uncontrolled, where cardiac arrest has occurred unexpectedly (Maastricht categories I and II), or controlled, where potential donors have life-sustaining treatment withdrawn after further interventions are deemed futile (Maastricht III), or circulatory death occurs in a donation after brain death (DBD) donor (Maastricht IV) (1).

Unlike DBD donors, livers from DCD donors undergo a variable period of warm ischaemia, during which irreversible cellular damage may occur. Reliably measuring the warm ischaemic period is difficult outside of hospital, which means that the use of livers from uncontrolled DCD donors is limited (2). In contrast, planned withdrawal of life-sustaining treatment in Maastricht III donors enables close cardiorespiratory monitoring, provision of a prepared procurement team, and minimisation of subsequent warm ischaemia. As such, the use of livers from controlled DCD donors has risen dramatically in the US (3) and Europe (4).

US registry analyses have demonstrated that DCD liver transplantation has worse graft and patient survival than DBD liver transplantation (5-9). This is thought to be predominantly due to a higher rate of biliary complications in DCD livers rather than other causes of graft loss (10). Recognition of these issues has perhaps contributed to a recent drop in the number of DCD livers transplanted in the US (3, 11). However, as a result of encouraging early reports (12) and decreasing DBD liver transplantation rates, the use of DCD livers in the UK is now more widespread than the US.

As there are differences between UK and US practice with respect to how DCD livers are being used (13, 14), we report in this paper graft loss and recipient mortality after transplantation of DCD and DBD livers in the UK. Two risk-adjustment techniques were used to control for differences in donor and recipient risk factors.

## Materials and methods

### Inclusion criteria

Using data submitted to the UK Liver Transplant Audit (15) we identified all adult patients (age >16 years) receiving a first liver transplant in the 7 UK transplant centres in the UK between 1 January 2005 and 31 December 2010. Follow-up ceased on 31 March 2011. Regular checks show that data are consistently both more than 93% complete and accurate (16-18). Patients receiving living or domino donors were excluded, as were those having an emergency ('super-urgent' (19)) or multi-organ transplant. We are not aware of any uncontrolled DCD liver transplants having been performed in the UK during the study period.

### Donor and recipient selection and organ procurement

Criteria for DCD donor selection and acceptable post-withdrawal haemodynamic parameters varied among the liver transplant centres, but were broadly based on the experience of Muiesan et al (12), and in line with US guidelines (19). Administration of heparin or vasodilators, or pre-dissection of femoral vessels before death, is prohibited by law in the UK. Death was declared after cardiorespiratory arrest with a minimum interval of five minutes. All UK liver procurement centres used a super-rapid recovery technique (19), although preservation fluid type, bag pressure, and the use of dual perfusion techniques varied.

Livers from DCD and DBD donors were allocated locally, and centres chose recipients according to local criteria (20). Optimal livers from DBD donors were offered to paediatric centres for splitting and implantation of the left lateral segment, with implantation of the extended right lobe into an adult recipient.

### Statistical analyses

Pearson's chi-squared test was used to test differences of categorical variables and Student's t-test or Mann Whitney test for differences of continuous variables. Graft and recipient survival after transplantation were estimated using Kaplan-Meier methods. Graft loss was defined as re-transplantation or death, regardless of perceived graft function at the time of death. Cold ischaemic time was defined as the duration from the start of cold perfusion of the liver in the donor to organ removal from ice immediately prior to implantation.

A multivariable Cox regression model was used to adjust the comparisons of graft loss and recipient mortality between DCD and DBD livers for differences in risk factors at the time of transplantation. The donor, recipient and operative characteristics presented in Table 1 and 2 were included in the model (see Table 1 and 2). United Kingdom End-Stage Liver Disease (UKELD) and Model for End-

1  
2  
3 Stage Liver Disease (MELD) scores were calculated for recipients (21, 22), but these scores were not  
4 incorporated in the multivariable model as the component variables of both were already included.  
5  
6

7  
8 To test whether the impact of using DCD livers on graft loss and patient mortality varied among UK  
9 transplant centre, we included an interaction term of donor type and centre in the Cox model. The  
10 likelihood ratio test was used to test the statistical significance of the risk factors. The results of the  
11 survival analyses are presented as hazard ratios (HR) with 95% confidence intervals (CI).  
12  
13

14  
15 An analysis with propensity score matching was also conducted. The propensity score is the  
16 probability that a recipient would have received a liver from a DCD (as opposed to a DBD) donor,  
17 based on observed donor and recipient characteristics. A logistic regression model was used to  
18 generate the propensity score (23). Donor type was regressed on main effects only and donor,  
19 recipient and operative characteristics were selected using a stepwise process with conservative  
20 removal ( $p > 0.20$ ) and entry criteria ( $p < 0.10$ ). We considered all two-way interactions of the main  
21 effects and explored non-linear relationships by including quadratic terms of continuous model  
22 factors. All interactions and quadratic terms with a  $p < 0.05$  were selected. We estimated the  
23 propensity score based on the logistic regression model as the sum of the products of the model  
24 factors and their coefficients. Then, for each recipient in the DCD group we selected an individual  
25 from the DBD group by matching on the log of the estimated propensity score, using a nearest-  
26 neighbour matching algorithm with callipers (an interval) of maximum width of 0.2 standard  
27 deviations. We compared the distribution of all model factors in the DCD and DBD groups to assess  
28 the success of the propensity score model. The above processes were repeated for each of the ten  
29 imputed data sets (see below for a description of methods to deal with missing data). The balance in  
30 the covariates across the treatment groups was considered to be achieved if the standardised  
31 differences were less than 10%. (24). Cox regression was then performed on each of the ten sets of  
32 matched pairs to estimate the effect of donor type on patient and graft survival. A robust standard  
33 error was used to allow for the clustering on the pairs. The estimates were then combined using  
34 Rubin's rules to provide adjusted hazard ratios and their 95% CI.  
35  
36  
37  
38  
39  
40  
41  
42  
43  
44  
45  
46

47 In addition to the donor, recipient and operative characteristics presented in Table 1 and 2, we also  
48 considered the following characteristics as candidates for inclusion in the propensity score model (all  
49 are yes/no unless otherwise stated): lifestyle activity score on 5-point scale, liver failure grade  
50 (acute/not acute), encephalopathy grade on 5-point scale, oesophageal varices, diuretic therapy,  
51 pyrexia, sepsis, haemoglobin, white cell count, platelet count, serum urea, anti-CMV status, and anti-  
52 HCV status. Types of biliary and hepatic arterial anastomoses were also considered as was the use of  
53 anti-fibrinolytic therapy.  
54  
55  
56  
57  
58  
59  
60

**Missing values**

All model factors had missing values for less than 5% of patients with the exception of donor history of diabetes (7%), donor organ appearance (19%). Multiple imputation using chained equations was used to fill in missing values for donor diabetes history and donor organ appearance but not the DCD donor post-withdrawal times. The imputation model included the model factors above, type of donor, as well as terms representing the outcome (log of survival time and the censoring indicator) (25). We created 10 imputed data sets and the model parameters based on these datasets were combined using Rubin's rules.

For peer review only



## Results

We identified 2572 first elective adult liver transplants. Of these, 352 (14%) had a graft from a DCD donor. Use of livers from DCD donors progressively increased from 6.9% in 2005 to 26.3% in 2010, an almost four-fold rise over that time period. Two centres used DCD donor livers in more than 30% of first elective adult liver transplants in 2010.

### Donor, recipient, and operative characteristics

Compared to DBD liver donors, DCD donors were younger, had lower BMIs, lower serum sodium concentrations, and were more likely to be male (Table 1). Although a similar proportion of organs appeared normal in the two groups, DCD donors had a higher proportion of missing values (29%) than DBD donors (18%). The cause of death for DBD donors was predominantly stroke (70%), whereas the corresponding proportion in the DCD group was 49%. Trauma was more common in DCD donors (23%) than in DBD donors (11%). In 352 DCD donors, the median (interquartile range) time from withdrawal of life-support to cardiac arrest was 15 (11 to 20) minutes whereas the median duration from cardiac arrest to cold perfusion was 12 (9 to 14) minutes.

Recipients of a DCD liver were more likely to be older, male, have lower serum bilirubin concentration, and cancer as the primary liver disease (Table 2). Both UKELD and MELD scores were lower in recipients of DCD livers, most probably because a higher proportion of DCD recipients had cancer as their primary disease. DCD livers were more likely to be used as whole rather than partial grafts. Median graft CIT was significantly lower for DCD livers, and there were more ethnicity mismatches in this group.

### Graft and patient survival

Graft loss was higher in DCD recipients (Figure 1), with a three-year graft loss (95% CI) of 27.3% (21.8 to 33.9) for DCD recipients and 18.2% (16.4 to 20.2) for DBD recipients with an unadjusted HR of 1.6 (1.2 to 2.0) (Table 3). Recipient mortality was also increased with DCD livers (Figure 1). Three-year mortality was 14.1% (12.5 to 16.0) for DBD recipients and 19.4% (14.5 to 25.6) for DCD recipients with an unadjusted mortality HR of 1.4 (1.1 to 2.0) for use of a DCD donor liver.

After adjustment using the multivariable Cox regression model, we found that the risk of graft loss within three years of transplantation in recipients of a DCD donor liver was more than twice that of those receiving a DBD liver: adjusted HR 2.3 (1.7 to 3.0). Adjusted three-year patient mortality was also significantly higher in recipients of livers from DCD donors: adjusted HR 2.0 (1.4 to 2.8) (Table 3).

1  
2  
3 After adjustment using the propensity score analysis, use of a liver from a DCD donor was associated  
4 with an adjusted HR of 2.3 (1.3 to 4.1) for graft loss. The adjusted HR for recipient mortality was 2.0  
5 (1.0 to 4.2) (Table 3).  
6  
7

### 8 9 **Centre-specific estimates of DCD risk**

10 Although the interaction between donor type and centre was not statistically significant for either graft  
11 loss ( $p = 0.08$ ) or recipient mortality ( $p = 0.24$ ), the relative impact of using DCD livers on graft loss  
12 and recipient mortality seemed to vary among the seven transplant centres. Centre-specific adjusted  
13 HRs for graft loss and recipient mortality varied from being smaller than 1 to larger than 4 (Figure 2).  
14  
15  
16

### 17 18 **Causes of graft loss**

19 When causes of graft loss were analysed over three years post-transplantation, the rates of biliary  
20 causes of graft loss were higher in livers from DCD donors (4/72 (6%)) than DBD donors (4/330  
21 (1%)) ( $p = 0.04$ ). Rates of biliary stricture requiring intervention were very similar between the two  
22 groups (DCD donors 13/347 (4%) versus DBD donors 81/2193 (4%)) ( $p = 0.96$ ).  
23  
24  
25  
26  
27  
28  
29  
30  
31  
32  
33  
34  
35  
36  
37  
38  
39  
40  
41  
42  
43  
44  
45  
46  
47  
48  
49  
50  
51  
52  
53  
54  
55  
56  
57  
58  
59  
60

## Discussion

Recipients of DCD livers, after risk-adjustment, have approximately twice the risk of graft loss and death within 3 years of transplantation than recipients of livers from DBD donors. This is the first study that has analysed risk-adjusted outcomes in recipients of livers from DCD donors outside of the US. Although US-based studies have reported on larger numbers of DCD liver transplant recipients (6, 7, 9, 13), rates of DCD liver usage in the UK are more than double those of the US (3, 14).

Our results contrast with single-centre reports that demonstrate good short-term results with liver transplantation from DCD donors (12, 26), with graft loss and patient mortality similar to those from DBD donors (27-29). However, it is important to note that we found that the impact of using DCD livers on graft loss and recipient mortality seemed to differ among the seven UK transplant centres, although these differences did not reach statistical significance. This finding indicates that it is important to investigate centre-specific practices that may impact on the outcomes of transplantation of DCD livers, including the selection of DCD grafts, definition of warm ischemic limits, and procurement and implantation techniques.

Risk factors for graft loss and patient mortality are unevenly distributed between DBD and DCD donors and recipients. Risk adjustment or matching techniques (30) are therefore crucial for a valid comparison of outcomes. Because estimates from multivariable models can be less robust when many factors are included, we also used propensity score matching. Reassuringly, both risk-adjustment techniques gave similar HRs for graft loss and recipient death.

In the UK, DCD liver donors are marginally older and have longer times from withdrawal of life-sustaining treatment to cold perfusion than in the US (6, 7, 9, 13, 14, 31). These differences are likely to reflect a wider acceptance of transplantation of DCD livers in the UK and that treatment withdrawal in the UK takes place in the intensive care unit or the anaesthetic room but not in theatre itself. However, cold ischaemic times are shorter for DCD livers in the UK, even taking into account differences in definitions between the two countries (6, 7, 13, 32). This may be due to geographical differences between the two countries (i.e. longer distances between procuring and implanting centres), or an increased willingness on the part of UK surgeons to begin the recipient operation before the organ arrives at the implanting centre.

Transplanted livers from DCD donors appear particularly susceptible to biliary complications, most commonly ischaemic cholangiopathy, which is thought to occur as a result of warm ischaemic damage to the biliary epithelium sustained during the procurement process (10, 33-36). We examined

1  
2  
3 rates of graft loss from biliary causes and found that this was a relatively rare cause of graft loss in  
4 DCD as well as in DBD recipients. In addition, there was no difference in the proportion of DCD and  
5 DBD recipients who required an intervention for biliary strictures. Although these findings concur  
6 with previous reports suggesting that ischaemic cholangiopathy is not a major problem in UK  
7 recipients of livers from DCD donors (26, 27), it should be recognised that analyses of national  
8 registry data are prone to under-reporting of post-operative complications.  
9  
10  
11

12  
13  
14 Unfortunately, data on time from withdrawal of life-sustaining treatment to cardiac arrest were  
15 missing in more than 50% of DCD donors, and therefore the impact of this variable on outcome was  
16 not assessed. Prolonged time from cardiac arrest to cold perfusion has been shown to be a risk factor  
17 for the development of ischaemic cholangiopathy (35), and would therefore be expected to lead to  
18 decreased graft survival. We found no significant association (data not shown). This is again likely to  
19 be due to lack of power or to most DCD donors having similar times, with an interquartile range of  
20 just 5 minutes.  
21  
22  
23  
24

25  
26 Defining acceptable warm ischaemic limits for livers from DCD donors is hampered by the lack of  
27 data on donor cardiorespiratory parameters after treatment withdrawal. Some controlled DCD donors  
28 have prolonged periods of cardiorespiratory stability before dying rapidly. It is therefore possible that  
29 the duration of hypotension or hypoxia has a greater impact on subsequent graft viability than the  
30 duration from treatment withdrawal to cardiac arrest or cold perfusion (8, 37). National prospective  
31 data collection of post-withdrawal cardiorespiratory parameters in Maastricht III DCD donors has  
32 therefore been initiated in both the UK and the US (8). Further research is also required into the  
33 impact of procurement techniques and preservation fluids on graft function (38), and the emerging  
34 role of machine perfusion (29).  
35  
36  
37  
38  
39  
40

41 The allocation of deceased donor livers in the UK is currently on a local basis, with national organ  
42 sharing only for those patients with acute liver failure reaching specific criteria (20). Although local  
43 allocation reduces cold ischaemic time, which is an important risk factor for graft survival, the current  
44 system raises issues of equity of access to a national resource. The ultimate aim of our analyses of  
45 national data is to inform discussions on how best to utilise this resource (40). For example, one could  
46 use our results as further support for not using livers from DCD donors for patients with a low risk of  
47 death on the waiting list as these recipients are able to wait for a graft that is more likely to have a  
48 favourable long-term outcome. An exception could be made for patients with HCC. Although, these  
49 patients generally have low UKELD scores – indicating a low risk of mortality on the waiting list –  
50 they have a high risk of disease progression, which is an additional argument to use livers from DCD  
51 donors for this group.  
52  
53  
54  
55  
56  
57  
58  
59  
60

1  
2  
3 The relative benefit associated with transplantation of a DCD versus a DBD donor liver is expected to  
4 be dependent not only on donor and recipient factors, but also on the overall availability of donor  
5 livers within each region or country, the rate of deaths on the waiting list, and the impact of DCD  
6 transplantation on the subsequent need for re-transplantation (41). Allocation policies also need to  
7 determine whether DCD organs are to be distributed on the basis of utility, urgency, or overall  
8 survival benefit (42). Although livers transplanted from DCD donors have inferior outcomes to those  
9 from DBD donors, they remain a valuable additional source of grafts, especially in countries with  
10 relatively low rates of DBD organ donation.  
11  
12  
13  
14  
15  
16  
17  
18  
19  
20  
21  
22  
23  
24  
25  
26  
27  
28  
29  
30  
31  
32  
33  
34  
35  
36  
37  
38  
39  
40  
41  
42  
43  
44  
45  
46  
47  
48  
49  
50  
51  
52  
53  
54  
55  
56  
57  
58  
59  
60

## Conflict of interest

None

## Acknowledgements

The authors would like to thank all seven UK liver transplant centres for providing data to the UK Liver Transplant Audit. We would also like to thank all those involved in collecting and handling liver transplant data at the National Health Service Blood and Transplant authority, and Kerri Barber, lead liver transplant statistician at the authority.

Supported by the NHS National Specialised Commissioning Group.

## References

- 1  
2  
3  
4  
5  
6  
7  
8  
9  
10  
11  
12  
13  
14  
15  
16  
17  
18  
19  
20  
21  
22  
23  
24  
25  
26  
27  
28  
29  
30  
31  
32  
33  
34  
35  
36  
37  
38  
39  
40  
41  
42  
43  
44  
45  
46  
47  
48  
49  
50  
51  
52  
53  
54  
55  
56  
57  
58  
59  
60
- (1) Kootstra G, Daemen JH, Oomen AP. Categories of non-heart-beating donors. *Transplantation proceedings*. 1995 Oct;27(5):2893-4.
- (2) Jimenez-Galanes S, Meneu-Diaz MJ, Elola-Olaso AM, et al. Liver transplantation using uncontrolled non-heart-beating donors under normothermic extracorporeal membrane oxygenation. *Liver Transpl*. 2009 Sep;15(9):1110-8.
- (3) Thuluvath PJ, Guidinger MK, Fung JJ, Johnson LB, Rayhill SC, Pelletier SJ. Liver transplantation in the United States, 1999-2008. *Am J Transplant*. 2010 Apr;10(4 Pt 2):1003-19.
- (4) Dominguez-Gil B, Haase-Kromwijk B, Van Leiden H, et al. Current situation of donation after circulatory death in European countries. *Transpl Int*. 2011 Jul;24(7):676-86.
- (5) Abt PL, Desai NM, Crawford MD, et al. Survival following liver transplantation from non-heart-beating donors. *Ann Surg*. 2004 Jan;239(1):87-92.
- (6) Mateo R, Cho Y, Singh G, et al. Risk factors for graft survival after liver transplantation from donation after cardiac death donors: an analysis of OPTN/UNOS data. *Am J Transplant*. 2006 Apr;6(4):791-6.
- (7) Lee KW, Simpkins CE, Montgomery RA, Locke JE, Segev DL, Maley WR. Factors affecting graft survival after liver transplantation from donation after cardiac death donors. *Transplantation*. 2006 Dec 27;82(12):1683-8.
- (8) Mathur AK, Heimbach J, Steffick DE, Sonnenday CJ, Goodrich NP, Merion RM. Donation after cardiac death liver transplantation: predictors of outcome. *Am J Transplant*. 2010 Nov;10(11):2512-9.
- (9) Jay C, Skaro A, Ladner D, et al. A comprehensive risk assessment of mortality following donation after cardiac death liver transplant - An analysis of the national registry. *J Hepatol*. 2011;44(4):808-13.
- (10) Jay CL, Lyuksemburg V, Ladner DP, et al. Ischemic cholangiopathy after controlled donation after cardiac death liver transplantation: a meta-analysis. *Ann Surg*. 2011 Feb;253(2):259-64.
- (11) Renz JF. Is DCD for liver transplantation DNR? *Am J Transplant*. 2008 Mar;8(3):485-8.
- (12) Muiesan P, Girlanda R, Jassem W, et al. Single-center experience with liver transplantation from controlled non-heartbeating donors: a viable source of grafts. *Ann Surg*. 2005 Nov;242(5):732-8.
- (13) Merion RM, Pelletier SJ, Goodrich N, Englesbe MJ, Delmonico FL. Donation after cardiac death as a strategy to increase deceased donor liver availability. *Ann Surg*. 2006 Oct;244(4):555-62.
- (14) NHS Blood and Transplant. *Transplant activity in the UK; 2008*.
- (15) <http://www.rcseng.ac.uk/surgeons/research/surgical-research/docs/uk-liver-transplant-audit-report-2011>. Accessed 14 August 2012.

- 1  
2  
3 (16) Hartley P, Petruckevitch A, Reeves B, Rolles K. The National Liver Transplantation audit: an  
4 overview of patients presenting for liver transplantation from 1994 to 1998. On behalf of the Steering  
5 Group of the UK Liver Transplantation Audit. *Br J Surg*. 2001 Jan;88(1):52-8.  
6  
7 (17) Jacob M, Copley LP, Lewsey JD, et al. Pretransplant MELD score and post liver  
8 transplantation survival in the UK and Ireland. *Liver Transpl*. 2004 Jul;10(7):903-7.  
9  
10 (18) van der Meulen JH, Jacob M, Copley L. Assessing the quality of the data in a transplant  
11 registry: the European Liver Transplant Registry. *Transplantation*. 2003 Jun 27;75(12):2164-7.  
12  
13 (19) Reich DJ, Mulligan DC, Abt PL, et al. ASTS recommended practice guidelines for controlled  
14 donation after cardiac death organ procurement and transplantation. *Am J Transplant*. 2009  
15 Sep;9(9):2004-11.  
16  
17 (20) Neuberger J, Gimson A, Davies M, et al. Selection of patients for liver transplantation and  
18 allocation of donated livers in the UK. *Gut*. 2008 Feb;57(2):252-7.  
19  
20 (21) Barber K, Madden S, Allen J, Collett D, Neuberger J, Gimson A. Elective liver transplant list  
21 mortality: Development of a United Kingdom End-Stage Liver Disease score. *Transplantation*. 2011  
22 Jul 19;92(4):469-76.  
23  
24 (22) Kamath PS, Wiesner RH, Malinchoc M, et al. A model to predict survival in patients with  
25 end-stage liver disease. *Hepatology*. 2001 Feb;33(2):464-70.  
26  
27 (23) Rosenbaum PR, Rubin DB. Reducing bias in observational studies using subclassification on  
28 the the propensity score. *J Am Stat Assoc* 1984;79:516-24.  
29  
30 (24) Austin PC, Mamdani MM. A comparison of propensity score methods: a case-study  
31 estimating the effectiveness of post-AMI statin use. *Stat Med*. 2006 Jun 30;25(12):2084-106.  
32  
33 (25) White IR, Royston P, Wood AM. Multiple imputation using chained equations: Issues and  
34 guidance for practice. *Stat Med*. 2011 Feb 20;30(4):377-99.  
35  
36 (26) Tariciotti L, Rocha C, Perera MT, et al. Is it time to extend liver acceptance criteria for  
37 controlled donors after cardiac death? *Transplantation*. 2011 Nov 27;92(10):1140-6.  
38  
39 (27) Deoliveira ML, Jassem W, Valente R, et al. Biliary complications after liver transplantation  
40 using grafts from donors after cardiac death: results from a matched control study in a single large  
41 volume center. *Ann Surg*. 2011 Nov;254(5):716-23.  
42  
43 (28) Mallik M, Callaghan CJ, Hope M, et al. Comparison of liver transplantation outcomes from  
44 adult split liver and circulatory death donors. *Br J Surg*. 2012 Jun;99(6):839-47.  
45  
46 (29) Grewal HP, Willingham DL, Nguyen J, et al. Liver transplantation using controlled donation  
47 after cardiac death donors: an analysis of a large single-center experience. *Liver Transpl*. 2009  
48 Sep;15(9):1028-35.  
49  
50 (30) Pine JK, Aldouri A, Young AL, et al. Liver transplantation following donation after cardiac  
51 death: an analysis using matched pairs. *Liver Transpl*. 2009 Sep;15(9):1072-82.  
52  
53 (31) Feng S, Goodrich NP, Bragg-Gresham JL, et al. Characteristics associated with liver graft  
54 failure: the concept of a donor risk index. *Am J Transplant*. 2006 Apr;6(4):783-90.  
55  
56  
57  
58  
59  
60



- 1  
2  
3  
4  
5  
6  
7  
8  
9  
10  
11  
12  
13  
14  
15  
16  
17  
18  
19  
20  
21  
22  
23  
24  
25  
26  
27  
28  
29  
30  
31  
32  
33  
34  
35  
36  
37  
38  
39  
40  
41  
42  
43  
44  
45  
46  
47  
48  
49  
50  
51  
52  
53  
54  
55  
56  
57  
58  
59  
60
- (32) Berg CL, Steffick DE, Edwards EB, et al. Liver and intestine transplantation in the United States 1998-2007. *Am J Transplant*. 2009 Apr;9(4 Pt 2):907-31.
- (33) Abt P, Crawford M, Desai N, Markmann J, Olthoff K, Shaked A. Liver transplantation from controlled non-heart-beating donors: an increased incidence of biliary complications. *Transplantation*. 2003 May 27;75(10):1659-63.
- (34) Foley DP, Fernandez LA, Levenson G, et al. Biliary complications after liver transplantation from donation after cardiac death donors: an analysis of risk factors and long-term outcomes from a single center. *Ann Surg*. 2011 Apr;253(4):817-25.
- (35) Taner CB, Bulatao IG, Willingham DL, et al. Events in procurement as risk factors for ischemic cholangiopathy in liver transplantation using donation after cardiac death donors. *Liver Transpl*. 2011 Aug 11.
- (36) Chan EY, Olson LC, Kisthard JA, et al. Ischemic cholangiopathy following liver transplantation from donation after cardiac death donors. *Liver Transpl*. 2008 May;14(5):604-10.
- (37) Ho KJ, Owens CD, Johnson SR, et al. Donor postextubation hypotension and age correlate with outcome after donation after cardiac death transplantation. *Transplantation*. 2008 Jun 15;85(11):1588-94.
- (38) Brockmann JG, Vaidya A, Reddy S, Friend PJ. Retrieval of abdominal organs for transplantation. *Br J Surg*. 2006 Feb;93(2):133-46.
- (39) de Rougemont O, Breitenstein S, Leskosek B, et al. One hour hypothermic oxygenated perfusion (HOPE) protects nonviable liver allografts donated after cardiac death. *Ann Surg*. 2009 Nov;250(5):674-83.
- (40) Morris PJ, Johnson RJ, Fuggle SV, Belger MA, Briggs JD. Analysis of factors that affect outcome of primary cadaveric renal transplantation in the UK. HLA Task Force of the Kidney Advisory Group of the United Kingdom Transplant Support Service Authority (UKTSSA). *Lancet*. 1999 Oct 2;354(9185):1147-52.
- (41) Selck FW, Grossman EB, Ratner LE, Renz JF. Utilization, outcomes, and retransplantation of liver allografts from donation after cardiac death: implications for further expansion of the deceased-donor pool. *Ann Surg*. 2008 Oct;248(4):599-607.
- (42) Merion RM, Sharma P, Mathur AK, Schaubel DE. Evidence-based development of liver allocation: a review. *Transpl Int*. 2011 Oct;24(10):965-72.

**Figure 1** - Graft survival after first elective adult liver transplantation using livers from donation after circulatory death (DCD) donors and donation after brain death (DBD) donors.

**Graft failure**

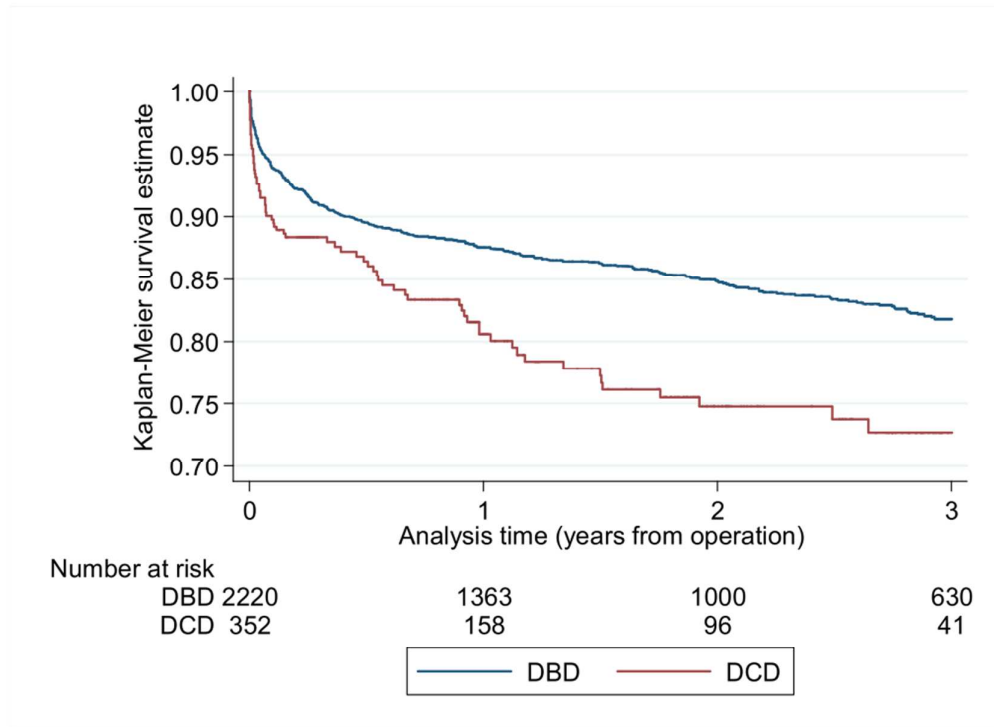

**Recipient mortality**

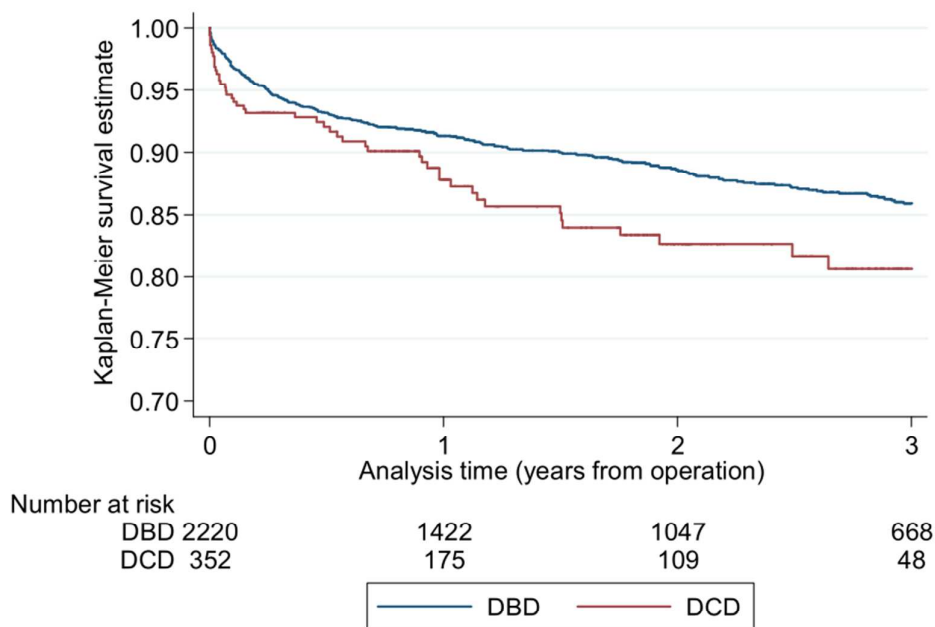

**Figure 2** - Centre specific hazard ratios (HR) and 95% CI comparing three-year graft loss (top figure) and recipient mortality (bottom figure). HRs greater than 1 indicate that risks of loss or mortality are greater with DCD than with DBD livers.

**Graft failure**

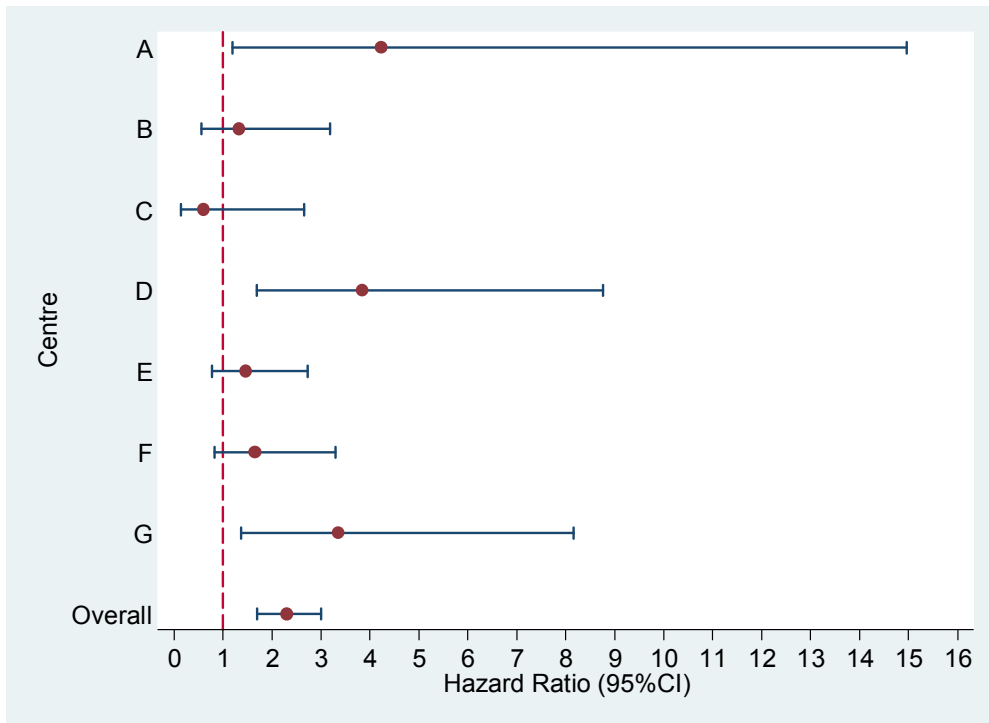

**Recipient mortality**

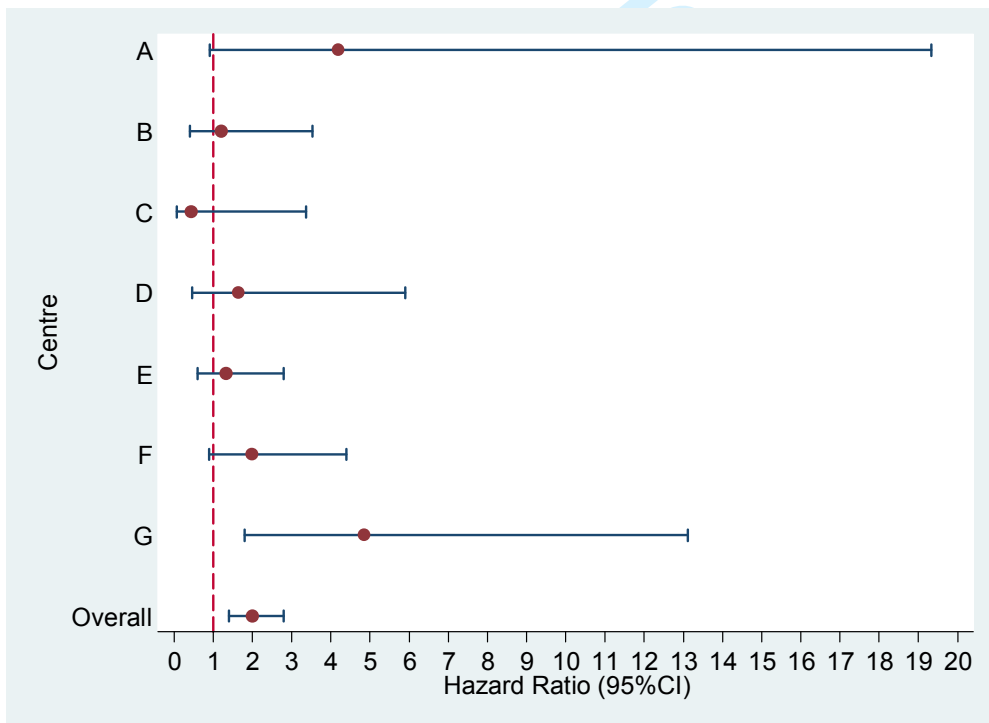

**Table 1** - Donor characteristics by donor type.

| <b>Liver donor type</b>     | DCD (n=352)      | DBD (n=2,220)    | p-value | Missing (n) |
|-----------------------------|------------------|------------------|---------|-------------|
| <b>Donor characteristic</b> |                  |                  |         |             |
| Age, years                  | 42 (16)          | 46 (15)          | <0.01   | 0           |
| Male sex                    | 206 (59)         | 1,158 (52)       | 0.03    | 0           |
| BMI, kg/m <sup>2</sup>      | 25 (4)           | 26 (7)           | <0.01   | 20          |
| Serum sodium, mmol/L        | 144 (140 to 150) | 147 (142 to 154) | <0.01   | 4           |
| Diabetes                    | 14 (5)           | 111 (5)          | 0.93    | 154         |
| Organ appearance            |                  |                  |         |             |
| Healthy                     | 176 (70)         | 1,384 (76)       | 0.05    | 497         |
| Suboptimal                  | 75 (30)          | 440 (24)         |         |             |
| Cause of death              |                  |                  |         |             |
| Trauma                      | 81 (23)          | 256 (12)         | <0.01   | 23          |
| Stroke                      | 173 (50)         | 1,546 (70)       |         |             |
| Anoxia                      | 54 (16)          | 198 (9)          |         |             |
| Other                       | 37 (11)          | 204 (9)          |         |             |

Values are numbers (percentages) for categorical variables and means (standard deviations) or median (interquartile range) otherwise. DBD - donation after brain death; DCD - donation after circulatory death.

**Table 2** - Recipient and operative characteristics by donor type.

| <b>Liver donor type</b>                        | DCD (n=352)      | DBD (n=2,220)    | p-value | Missing (n) |
|------------------------------------------------|------------------|------------------|---------|-------------|
| <b>Recipient and operative characteristics</b> |                  |                  |         |             |
| Age, years                                     | 53(9)            | 52 (11)          | 0.02    | 0           |
| Male sex                                       | 247 (70)         | 1,436 (65)       | 0.04    | 0           |
| BMI, kg/m <sup>2</sup>                         | 27(5)            | 27 (6)           | 0.94    | 12          |
| Serum sodium, mmol/L                           | 137 (134 to 140) | 137 (134 to 140) | 0.38    | 7           |
| Serum potassium, mmol/L                        | 4.2 (0.5)        | 4.2 (0.5)        | 0.23    | 52          |
| Serum creatinine, µmol/L                       | 89 (72 to 109)   | 86(72 to 104)    | 0.92    | 4           |
| Serum albumin, g/L                             | 32 (28 to 37)    | 32 (27 to 36)    | 0.40    | 14          |
| Serum bilirubin, mmol/L                        | 41(21 to 79)     | 47 (24 to 100)   | <0.01   | 8           |
| INR                                            | 1.4 (1.2 to 1.6) | 1.4 (1.2 to 1.6) | 0.90    | 54          |
| UKELD score                                    | 54 (50 to 57)    | 55 (51 to 59)    | <0.01   | 57          |
| MELD score                                     | 15 (11 to 19)    | 15 (12 to 20)    | 0.04    | 57          |
| <b>Primary liver disease</b>                   |                  |                  |         |             |
| Cancer                                         | 118 (33)         | 461 (21)         | <0.01   | 0           |
| HCV                                            | 47 (13)          | 265 (12)         |         |             |
| PSC                                            | 23 (7)           | 233 (10)         |         |             |
| HBV                                            | 6 (2)            | 52 (2)           |         |             |
| PBC                                            | 34 (10)          | 238 (11)         |         |             |
| ALD                                            | 71 (20)          | 516 (23)         |         |             |
| AID                                            | 22 (6)           | 193 (9)          |         |             |
| Metabolic                                      | 15 (4)           | 86 (4)           |         |             |
| Other                                          | 16 (5)           | 176 (8)          |         |             |
| <b>Previous abdominal surgery</b>              |                  |                  |         |             |
| No                                             | 315 (90)         | 1,931 (87)       | 0.15    | 10          |
| Yes                                            | 35 (10)          | 281 (13)         |         |             |
| <b>Inpatient &amp; ventilatory status</b>      |                  |                  |         |             |
| Outpatient                                     | 313 (89)         | 1,877 (85)       | 0.10    | 0           |
| Inpatient, not ventilated                      | 36(10)           | 322 (14)         |         |             |
| Ventilated                                     | 3 (1)            | 21 (1)           |         |             |
| Days in intensive care                         | 2 (1,4)          | 2 (1,4)          | 0.38    | 15          |
| <b>Pre-operative renal support</b>             |                  |                  |         |             |
| No                                             | 333 (95)         | 2,116 (96)       | 0.71    | 7           |
| Yes                                            | 18 (5)           | 98 (4)           |         |             |

|    |                           |                  |                   |       |    |
|----|---------------------------|------------------|-------------------|-------|----|
| 1  | Organ type                |                  |                   |       |    |
| 2  | Whole                     | 343 (97)         | 1,956 (88)        | <0.01 | 1  |
| 3  |                           |                  |                   |       |    |
| 4  | Partial                   | 9 (3)            | 263 (12)          |       |    |
| 5  | Cold ischaemic time, mins | 6.7 (5.6 to 8.0) | 9.5 (7.8 to 11.1) | <0.01 | 93 |
| 6  |                           |                  |                   |       |    |
| 7  | Anastomosis time, mins    | 41 (35 to 50)    | 42 (36 to 51)     | 0.42  | 90 |
| 8  |                           |                  |                   |       |    |
| 9  | Ethnicity mismatch        |                  |                   |       |    |
| 10 | No                        | 272 (77)         | 1,868 (84)        | <0.01 | 10 |
| 11 |                           |                  |                   |       |    |
| 12 | Yes                       | 79 (22)          | 343 (15)          |       |    |

14 Values are numbers (percentages) for categorical variables and means (standard deviations) or median  
 15 (interquartile range) otherwise. DBD - donation after brain death; DCD - donation after circulatory death; HCV  
 16 – hepatitis C virus; PSC – primary sclerosing cholangitis; HBV – hepatitis B virus; PBC – primary biliary  
 17 – hepatitis C virus; PSC – primary sclerosing cholangitis; HBV – hepatitis B virus; PBC – primary biliary  
 18 cirrhosis; ALD – alcoholic liver disease; AID – autoimmune disease.

**Table 3** - Recipient 3-year graft loss and mortality by donor type. Hazard ratios (HR) are unadjusted or adjusted based on either a multivariable Cox regression model or propensity score matching.

| Liver donor type                 |                     | Unadjusted HR    | Adjusted HR (95% | Adjusted HR      |
|----------------------------------|---------------------|------------------|------------------|------------------|
|                                  |                     | (95% CI)         | CI)              | (95% CI)         |
|                                  |                     |                  | Multivariable    | Propensity score |
|                                  |                     |                  | model            | analysis         |
| <b>3-year graft loss %</b>       |                     |                  |                  |                  |
| (95% CI)                         |                     |                  |                  |                  |
| Donation after circulatory death | 27.3 (21.8 to 33.9) | 1.6 (1.2 to 2.0) | 2.3 (1.7 to 3.0) | 2.3 (1.3 to 4.1) |
| Donation after brain death       | 18.2 (16.4 to 20.2) | 1                | 1                | 1                |
| <b>3-year mortality %</b>        |                     |                  |                  |                  |
| (95% CI)                         |                     |                  |                  |                  |
| Donation after circulatory death | 19.4 (14.5 to 25.6) | 1.4 (1.1 to 2.0) | 2.0 (1.4 to 2.8) | 2.0 (1.0 to 4.2) |
| Donation after brain death       | 14.1 (12.5 to 16.0) | 1                | 1                | 1                |

# Outcomes of transplantation of livers from donation after circulatory death donors in the UK

STROBE Statement—Checklist of items that should be included in reports of *cohort studies*

|                           | Item No | Recommendation                                                                                                                                                                       |                                                                                                                |
|---------------------------|---------|--------------------------------------------------------------------------------------------------------------------------------------------------------------------------------------|----------------------------------------------------------------------------------------------------------------|
| <b>Title and abstract</b> | 1       | (a) Indicate the study's design with a commonly used term in the title or the abstract                                                                                               | Page 2, Methods paragraph                                                                                      |
|                           |         | (b) Provide in the abstract an informative and balanced summary of what was done and what was found                                                                                  | Page 2, Results and Conclusion paragraphs                                                                      |
| <b>Introduction</b>       |         |                                                                                                                                                                                      |                                                                                                                |
| Background/rationale      | 2       | Explain the scientific background and rationale for the investigation being reported                                                                                                 | Page 4, first three paragraphs of Introduction                                                                 |
| Objectives                | 3       | State specific objectives, including any prespecified hypotheses                                                                                                                     | Page 4, last paragraph of Introduction                                                                         |
| <b>Methods</b>            |         |                                                                                                                                                                                      |                                                                                                                |
| Study design              | 4       | Present key elements of study design early in the paper                                                                                                                              | Page 5, first paragraph of Methods                                                                             |
| Setting                   | 5       | Describe the setting, locations, and relevant dates, including periods of recruitment, exposure, follow-up, and data collection                                                      | Ibidem                                                                                                         |
| Participants              | 6       | (a) Give the eligibility criteria, and the sources and methods of selection of participants. Describe methods of follow-up                                                           | Page 5, second and third paragraph of Methods                                                                  |
|                           |         | (b) For matched studies, give matching criteria and number of exposed and unexposed                                                                                                  | N/A                                                                                                            |
| Variables                 | 7       | Clearly define all outcomes, exposures, predictors, potential confounders, and effect modifiers. Give diagnostic criteria, if applicable                                             | Page 5 – 7, Statistical analysis section in Methods                                                            |
| Data sources/measurement  | 8*      | For each variable of interest, give sources of data and details of methods of assessment (measurement). Describe comparability of assessment methods if there is more than one group | Page 5, first paragraph in Methods                                                                             |
| Bias                      | 9       | Describe any efforts to address potential sources of bias                                                                                                                            | Page 5-7 in Methods section describing the multivariable regression analysis and the propensity score matching |
| Study size                | 10      | Explain how the study size was arrived at                                                                                                                                            | Page 5, first paragraph of Methods                                                                             |
| Quantitative variables    | 11      | Explain how quantitative variables were handled in the analyses. If applicable, describe which groupings were chosen and why                                                         | Page 5, second paragraph of                                                                                    |



|                     |     |                                                                                                                                                                                                              | Methods                                                                     |
|---------------------|-----|--------------------------------------------------------------------------------------------------------------------------------------------------------------------------------------------------------------|-----------------------------------------------------------------------------|
| Statistical methods | 12  | (a) Describe all statistical methods, including those used to control for confounding                                                                                                                        | Page 5 – 7, Statistical analysis section in Methods                         |
|                     |     | (b) Describe any methods used to examine subgroups and interactions                                                                                                                                          | Ibidem                                                                      |
|                     |     | (c) Explain how missing data were addressed                                                                                                                                                                  | Page 7, last paragraph of methods section                                   |
|                     |     | (d) If applicable, explain how loss to follow-up was addressed                                                                                                                                               | N/A                                                                         |
|                     |     | (e) Describe any sensitivity analyses                                                                                                                                                                        | N/A                                                                         |
| <b>Results</b>      |     |                                                                                                                                                                                                              |                                                                             |
| Participants        | 13* | (a) Report numbers of individuals at each stage of study—eg numbers potentially eligible, examined for eligibility, confirmed eligible, included in the study, completing follow-up, and analysed            | Page 8, first paragraph of Results                                          |
|                     |     | (b) Give reasons for non-participation at each stage                                                                                                                                                         | N/A                                                                         |
|                     |     | (c) Consider use of a flow diagram                                                                                                                                                                           | Not used                                                                    |
| Descriptive data    | 14* | (a) Give characteristics of study participants (eg demographic, clinical, social) and information on exposures and potential confounders                                                                     | Page 8, second and third paragraph of Results                               |
|                     |     | (b) Indicate number of participants with missing data for each variable of interest                                                                                                                          | Page 19 and 20, Table 1 and 2                                               |
|                     |     | (c) Summarise follow-up time (eg, average and total amount)                                                                                                                                                  | Not done as we have near complete follow-up                                 |
| Outcome data        | 15* | Report numbers of outcome events or summary measures over time                                                                                                                                               | Page 22, Table 3 and Page 17, Figure 1                                      |
| Main results        | 16  | (a) Give unadjusted estimates and, if applicable, confounder-adjusted estimates and their precision (eg, 95% confidence interval). Make clear which confounders were adjusted for and why they were included | Page 22, Table 3                                                            |
|                     |     | (b) Report category boundaries when continuous variables were categorized                                                                                                                                    | N/A                                                                         |
|                     |     | (c) If relevant, consider translating estimates of relative risk into absolute risk for a meaningful time period                                                                                             | N/A                                                                         |
| Other analyses      | 17  | Report other analyses done—eg analyses of subgroups and interactions, and sensitivity analyses                                                                                                               | Page 9, centre-specific estimates, penultimate paragraph of Results section |
| <b>Discussion</b>   |     |                                                                                                                                                                                                              |                                                                             |
| Key results         | 18  | Summarise key results with reference to study objectives                                                                                                                                                     | Page 10, first paragraph of Discussion                                      |
| Limitations         | 19  | Discuss limitations of the study, taking into account sources of potential bias or imprecision. Discuss both direction and                                                                                   | Page 11, second and third                                                   |

|                          |    |                                                                                                                                                                            |                                                            |
|--------------------------|----|----------------------------------------------------------------------------------------------------------------------------------------------------------------------------|------------------------------------------------------------|
|                          |    | magnitude of any potential bias                                                                                                                                            | paragraph,<br>Discussion                                   |
| Interpretation           | 20 | Give a cautious overall interpretation of results considering objectives, limitations, multiplicity of analyses, results from similar studies, and other relevant evidence | Page 10, second paragraph and fourth paragraph, Discussion |
| Generalisability         | 21 | Discuss the generalisability (external validity) of the study results                                                                                                      | Page 10, fourth paragraph                                  |
| <b>Other information</b> |    |                                                                                                                                                                            |                                                            |
| Funding                  | 22 | Give the source of funding and the role of the funders for the present study and, if applicable, for the original study on which the present article is based              | Page 13, Acknowledgements                                  |

\*Give information separately for exposed and unexposed groups.

**Note:** An Explanation and Elaboration article discusses each checklist item and gives methodological background and published examples of transparent reporting. The STROBE checklist is best used in conjunction with this article (freely available on the Web sites of PLoS Medicine at <http://www.plosmedicine.org/>, Annals of Internal Medicine at <http://www.annals.org/>, and Epidemiology at <http://www.epidem.com/>). Information on the STROBE Initiative is available at <http://www.strobe-statement.org>.

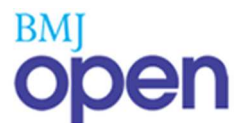

## Outcomes of transplantation of livers from donation after circulatory death donors in the UK

|                                 |                                                                                                                                                                        |
|---------------------------------|------------------------------------------------------------------------------------------------------------------------------------------------------------------------|
| Journal:                        | <i>BMJ Open</i>                                                                                                                                                        |
| Manuscript ID:                  | bmjopen-2013-003287.R1                                                                                                                                                 |
| Article Type:                   | Research                                                                                                                                                               |
| Date Submitted by the Author:   | 15-Jul-2013                                                                                                                                                            |
| Complete List of Authors:       | Callaghan, Christopher<br>Charman, Susan<br>Muesan, Paolo<br>Powell, James<br>Gimson, Alexander<br>van der Meulen, Jan; London School of Hygiene and Tropical Medicine |
| <b>Primary Subject Heading</b>: | Gastroenterology and hepatology                                                                                                                                        |
| Secondary Subject Heading:      | Surgery, Gastroenterology and hepatology, Health services research                                                                                                     |
| Keywords:                       | Hepatobiliary surgery < SURGERY, Transplantation, EPIDEMIOLOGY, STATISTICS & RESEARCH METHODS                                                                          |
|                                 |                                                                                                                                                                        |

SCHOLARONE™  
Manuscripts

## Original article

# Outcomes of transplantation of livers from donation after circulatory death donors in the UK

Christopher J Callaghan<sup>1</sup>, Susan C Charman<sup>2,3</sup>, Paolo Muiesan<sup>4</sup>, James J Powell<sup>5</sup>, Alexander E Gimson<sup>1</sup>, Jan HP van der Meulen<sup>2,3</sup>, on behalf of the UK Liver Transplant Audit

22 May 2013

### Authors' affiliations

1. Cambridge Transplant Centre, Addenbrooke's Hospital, Cambridge, UK
2. Clinical Effectiveness Unit, Royal College of Surgeons of England, London, UK
3. Department of Health Services Research and Policy, London School of Hygiene and Tropical Medicine, London, UK
4. Department of Liver Transplantation and Hepatopancreatobiliary Surgery, Queen Elizabeth Hospital, Birmingham, UK
5. Scottish Liver Transplant Unit, Royal Infirmary of Edinburgh, Edinburgh, UK

### Corresponding author

Jan van der Meulen  
Professor of Clinical Epidemiology  
Department of Health Services Research and Policy  
London School of Hygiene and Tropical Medicine  
15 – 17 Tavistock Place  
London WC1H 9SH  
United Kingdom  
Email: [jan.vandermeulen@lshtm.ac.uk](mailto:jan.vandermeulen@lshtm.ac.uk)

**Key words:** liver transplantation, donation after circulatory death, mortality, graft loss

### Word count:

**Abstract:** 248

**Text:** 2917

**Tables:** 3

**Figures:** 2

## Abstract

**Objectives:** Outcomes of liver transplantations from donation after circulatory death (DCD) donors may be inferior to those achieved with donation after brain death (DBD) donors. The impact of using DCD donors is likely to depend on specific national practices. We compared risk-adjusted graft loss and recipient mortality after transplantation of DCD and DBD livers in the UK.

**Design:** Prospective cohort study. Multivariable Cox regression and propensity score matching were used to estimate risk-adjusted hazard ratios (HR).

**Setting:** Seven liver transplant centres in NHS hospitals in England and Scotland.

**Participants:** Adults who received a first elective liver transplant between January 2005 and December 2010 who were identified in the UK Liver Transplant Audit.

**Interventions:** Transplantation of DCD and DBD livers.

**Outcomes:** Graft loss and recipient mortality.

**Results:** In total, 2572 liver transplants were identified with 352 (14%) from DCD donors. Three-year graft loss (95% CI) was higher with DCD livers (27.3%; 21.8% to 33.9%) than with DBD livers (18.2%; 16.4% to 20.2%). After adjustment with regression, the HR for graft loss was 2.3 (1.7 to 3.0). Similarly, three-year mortality was higher with DCD livers (19.4%; 14.5% - 25.6%) than with DBD livers (14.1%; 12.5% to 16.0%) with an adjusted HR of 2.0 (1.4 to 2.8). Propensity score matching gave similar results. Centre-specific adjusted HRs for graft loss and recipient mortality seemed to differ among transplant centres, although statistical evidence is weak (p-value for interaction 0.08 and 0.24, respectively).

**Conclusions:** Graft loss and recipient mortality were about twice as high with DCD livers as with DBD livers in the UK. Outcomes after DCD liver transplantation may vary between centres. These results should inform policies for use of DCD livers.

## Article Summary

### Article focus

- There is increasing disparity between demand and supply of donor livers for transplantation.
- The use of livers from donation after circulatory death (DCD) donors – in addition to those from donation after brain death (DBD) - increases the donor pool.
- We compared graft loss and recipient mortality after transplantation of DCD and DBD livers in the UK.

### Key messages

- Recipients of DCD livers, after risk-adjustment, have approximately twice the risk of graft loss and death within 3 years of transplantation than recipients of livers from DBD donors.
- The impact of using DCD livers on graft loss and recipient mortality seemed to differ among the seven UK transplant centres.

### Strengths and limitations of this study

- A national database was used with near complete inclusion of all liver transplantations in the UK with high data quality and follow-up, which eliminates the risk of selective reporting.
- Both multivariable regression analysis and propensity score matching were used to adjust for differences risk factors for graft loss and patient mortality between DBD and DCD donors and recipients.
- We were not able to assess the impact that time from withdrawal of life-sustaining treatment to cardiac arrest has on post-transplant outcomes of DCD livers.

## Introduction

The increasing disparity between the demand and supply of donor livers is a major challenge. The need to increase the donor pool, and improve organ utilisation, has led to the re-introduction and rapid expansion of the use of livers from donation after circulatory death (DCD) donors. These donors have been classified as either uncontrolled, where cardiac arrest has occurred unexpectedly (Maastricht categories I and II), or controlled, where potential donors have life-sustaining treatment withdrawn after further interventions are deemed futile (Maastricht III), or circulatory death occurs in a donation after brain death (DBD) donor (Maastricht IV) (1).

Unlike DBD donors, livers from DCD donors undergo a variable period of warm ischaemia, during which irreversible cellular damage may occur. Reliably measuring the warm ischaemic period is difficult outside of hospital, which means that the use of livers from uncontrolled DCD donors is limited (2). In contrast, planned withdrawal of life-sustaining treatment in Maastricht III donors enables close cardiorespiratory monitoring, provision of a prepared procurement team, and minimisation of subsequent warm ischaemia. As such, the use of livers from controlled DCD donors has risen dramatically in the US (3) and Europe (4).

US registry analyses have demonstrated that DCD liver transplantation has worse graft and patient survival than DBD liver transplantation (5-9). This is thought to be predominantly due to a higher rate of biliary complications in DCD livers rather than other causes of graft loss (10). Recognition of these issues has perhaps contributed to a recent drop in the number of DCD livers transplanted in the US (3, 11). However, as a result of encouraging early reports (12) and decreasing DBD liver transplantation rates, the use of DCD livers in the UK is now more widespread than the US.

As there are differences between UK and US practice with respect to how DCD livers are being used (13, 14), we report in this paper graft loss and recipient mortality after transplantation of DCD and DBD livers in the UK. Two risk-adjustment techniques were used to control for differences in donor and recipient risk factors.

## Materials and methods

### Inclusion criteria

Using data submitted to the UK Liver Transplant Audit (15) we identified all adult patients (age >16 years) receiving a first liver transplant in the seven UK transplant centres in the UK between 1 January 2005 and 31 December 2010. Follow-up ceased on 31 March 2011. Regular checks show that data are consistently both more than 93% complete and accurate (16-18). Patients receiving living or domino donors were excluded, as were those having an emergency ('super-urgent' (19)) or multi-organ transplant. We are not aware of any uncontrolled DCD liver transplants having been performed in the UK during the study period.

### Donor and recipient selection and organ procurement

Criteria for DCD donor selection and acceptable post-withdrawal haemodynamic parameters varied among the liver transplant centres, but were broadly based on the experience of Muiesan et al (12), and in line with US guidelines (19). Administration of heparin or vasodilators, or pre-dissection of femoral vessels before death, is prohibited by law in the UK. Death was declared after cardiorespiratory arrest with a minimum interval of five minutes. All UK liver procurement centres used a super-rapid recovery technique (19), although preservation fluid type, bag pressure, and the use of dual perfusion techniques varied.

Livers from DCD and DBD donors were allocated locally, and centres chose recipients according to local criteria (20). Optimal livers from DBD donors were offered to paediatric centres for splitting and implantation of the left lateral segment, with implantation of the extended right lobe into an adult recipient.

### Statistical analyses

Pearson's chi-squared test was used to test differences of categorical variables and Student's t-test or Mann Whitney test for differences of continuous variables. Graft and recipient survival after transplantation were estimated using Kaplan-Meier methods. Graft loss was defined as re-transplantation or death, regardless of perceived graft function at the time of death. Cold ischaemic time was defined as the duration from the start of cold perfusion of the liver in the donor to organ removal from ice immediately prior to implantation.

A multivariable Cox regression model was used to adjust the comparisons of graft loss and recipient mortality between DCD and DBD livers for differences in risk factors at the time of transplantation. The donor, recipient and operative characteristics presented in Table 1 and 2 were included in the model (see Table 1 and 2). United Kingdom End-Stage Liver Disease (UKELD) and Model for End-



1  
2  
3 Stage Liver Disease (MELD) scores were calculated for recipients (21, 22), but these scores were not  
4 incorporated in the multivariable model as the component variables of both were already included.  
5  
6

7  
8 To test whether the impact of using DCD livers on graft loss and patient mortality varied among UK  
9 transplant centre, we included an interaction term of donor type and centre in the Cox model. The  
10 likelihood ratio test was used to test the statistical significance of the risk factors. The results of the  
11 survival analyses are presented as hazard ratios (HR) with 95% confidence intervals (CI).  
12  
13

14  
15 An analysis with propensity score matching was also conducted. The propensity score is the  
16 probability that a recipient would have received a liver from a DCD (as opposed to a DBD) donor,  
17 based on observed donor and recipient characteristics. A logistic regression model was used to  
18 generate the propensity score (23). Donor type was regressed on main effects only and donor,  
19 recipient and operative characteristics were selected using a stepwise process with conservative  
20 removal ( $p > 0.20$ ) and entry criteria ( $p < 0.10$ ). We considered all two-way interactions of the main  
21 effects and explored non-linear relationships by including quadratic terms of continuous model  
22 factors. All interactions and quadratic terms with a  $p < 0.05$  were selected. We estimated the  
23 propensity score based on the logistic regression model as the sum of the products of the model  
24 factors and their coefficients. Then, for each recipient in the DCD group we selected an individual  
25 from the DBD group by matching on the log of the estimated propensity score, using a nearest-  
26 neighbour matching algorithm with callipers (an interval) of maximum width of 0.2 standard  
27 deviations. We compared the distribution of all model factors in the DCD and DBD groups to assess  
28 the success of the propensity score model. The above processes were repeated for each of the ten  
29 imputed data sets (see below for a description of methods to deal with missing data). The balance in  
30 the covariates across the treatment groups was considered to be achieved if the standardised  
31 differences were less than 10%. (24). Cox regression was then performed on each of the ten sets of  
32 matched pairs to estimate the effect of donor type on patient and graft survival. A robust standard  
33 error was used to allow for the clustering on the pairs. The estimates were then combined using  
34 Rubin's rules to provide adjusted hazard ratios and their 95% CI.  
35  
36  
37  
38  
39  
40  
41  
42  
43  
44  
45  
46

47 In addition to the donor, recipient and operative characteristics presented in Table 1 and 2, we also  
48 considered the following characteristics as candidates for inclusion in the propensity score model (all  
49 are yes/no unless otherwise stated): lifestyle activity score on 5-point scale, liver failure grade  
50 (acute/not acute), encephalopathy grade on 5-point scale, oesophageal varices, diuretic therapy,  
51 pyrexia, sepsis, haemoglobin, white cell count, platelet count, serum urea, anti-CMV status, and anti-  
52 HCV status. Types of biliary and hepatic arterial anastomoses were also considered as was the use of  
53 anti-fibrinolytic therapy.  
54  
55  
56  
57  
58  
59  
60

**Missing values**

All model factors had missing values for less than 5% of patients with the exception of donor history of diabetes (7%), donor organ appearance (19%). Multiple imputation using chained equations was used to fill in missing values for donor diabetes history and donor organ appearance but not the DCD donor post-withdrawal times. The imputation model included the model factors above, type of donor, as well as terms representing the outcome (log of survival time and the censoring indicator) (25). We created 10 imputed data sets and the model parameters based on these datasets were combined using Rubin's rules.

For peer review only

## Results

We identified 2572 first elective adult liver transplants. Of these, 352 (14%) had a graft from a DCD donor. Use of livers from DCD donors progressively increased from 6.9% in 2005 to 26.3% in 2010, an almost four-fold rise over that time period. Two centres used DCD donor livers in more than 30% of first elective adult liver transplants in 2010.

### Donor, recipient, and operative characteristics

Compared to DBD liver donors, DCD donors were younger, had lower BMIs, lower serum sodium concentrations, and were more likely to be male (Table 1). Although a similar proportion of organs appeared normal in the two groups, DCD donors had a higher proportion of missing values (29%) than DBD donors (18%). The cause of death for DBD donors was predominantly stroke (70%), whereas the corresponding proportion in the DCD group was 49%. Trauma was more common in DCD donors (23%) than in DBD donors (11%). In 352 DCD donors, the median (interquartile range) time from withdrawal of life-support to cardiac arrest was 15 (11 to 20) minutes whereas the median duration from cardiac arrest to cold perfusion was 12 (9 to 14) minutes.

Recipients of a DCD liver were more likely to be older, male, have lower serum bilirubin concentration, and cancer as the primary liver disease (Table 2). Both UKELD and MELD scores were lower in recipients of DCD livers, most probably because a higher proportion of DCD recipients had cancer as their primary disease. DCD livers were more likely to be used as whole rather than partial grafts. Median graft CIT was significantly lower for DCD livers, and there were more ethnicity mismatches in this group.

### Graft and patient survival

Graft loss was higher in DCD recipients (Figure 1), with a three-year graft loss (95% CI) of 27.3% (21.8 to 33.9) for DCD recipients and 18.2% (16.4 to 20.2) for DBD recipients with an unadjusted HR of 1.6 (1.2 to 2.0) (Table 3). Recipient mortality was also increased with DCD livers (Figure 1). Three-year mortality was 14.1% (12.5 to 16.0) for DBD recipients and 19.4% (14.5 to 25.6) for DCD recipients with an unadjusted mortality HR of 1.4 (1.1 to 2.0) for use of a DCD donor liver.

After adjustment using the multivariable Cox regression model, we found that the risk of graft loss within three years of transplantation in recipients of a DCD donor liver was more than twice that of those receiving a DBD liver: adjusted HR 2.3 (1.7 to 3.0). Adjusted three-year patient mortality was also significantly higher in recipients of livers from DCD donors: adjusted HR 2.0 (1.4 to 2.8) (Table 3).

1  
2  
3 After adjustment using the propensity score analysis, use of a liver from a DCD donor was associated  
4 with an adjusted HR of 2.3 (1.3 to 4.1) for graft loss. The adjusted HR for recipient mortality was 2.0  
5 (1.0 to 4.2) (Table 3).  
6  
7

### 8 9 **Centre-specific estimates of DCD risk**

10 Although the interaction between donor type and centre was not statistically significant for either graft  
11 loss ( $p = 0.08$ ) or recipient mortality ( $p = 0.24$ ), the relative impact of using DCD livers on graft loss  
12 and recipient mortality seemed to vary among the seven transplant centres. Centre-specific adjusted  
13 HRs for graft loss and recipient mortality varied from being smaller than 1 to larger than 4 (Figure 2).  
14  
15  
16

### 17 18 **Causes of graft loss**

19 When causes of graft loss were analysed over three years post-transplantation, the rates of biliary  
20 causes of graft loss were higher in livers from DCD donors (4/72 (6%)) than DBD donors (4/330  
21 (1%)) ( $p = 0.04$ ). Rates of biliary stricture requiring intervention were very similar between the two  
22 groups (DCD donors 13/347 (4%) versus DBD donors 81/2193 (4%)) ( $p = 0.96$ ).  
23  
24  
25  
26  
27  
28  
29  
30  
31  
32  
33  
34  
35  
36  
37  
38  
39  
40  
41  
42  
43  
44  
45  
46  
47  
48  
49  
50  
51  
52  
53  
54  
55  
56  
57  
58  
59  
60

## Discussion

Recipients of DCD livers, after risk-adjustment, have approximately twice the risk of graft loss and death within 3 years of transplantation than recipients of livers from DBD donors. This is the first study that has analysed risk-adjusted outcomes in recipients of livers from DCD donors outside of the US. Although US-based studies have reported on larger numbers of DCD liver transplant recipients (6, 7, 9, 13), rates of DCD liver usage in the UK are more than double those of the US (3, 14).

Our results contrast with single-centre reports that demonstrate good short-term results with liver transplantation from DCD donors (12, 26), with graft loss and patient mortality similar to those from DBD donors (27-29). However, it is important to note that we found that the impact of using DCD livers on graft loss and recipient mortality seemed to differ among the seven UK transplant centres, although these differences did not reach statistical significance. This finding indicates that it is important to investigate centre-specific practices that may impact on the outcomes of transplantation of DCD livers, including the selection of DCD grafts, definition of warm ischemic limits, and procurement and implantation techniques.

Risk factors for graft loss and patient mortality are unevenly distributed between DBD and DCD donors and recipients. For example, partial organs were more often used for DBD recipients than for DCD recipients. However, risk adjustment or matching techniques (30) are therefore crucial for a valid comparison of outcomes. Because estimates from multivariable models can be less robust when many factors are included, we also used propensity score matching. Reassuringly, both risk-adjustment techniques gave similar HRs for graft loss and recipient death.

In the UK, DCD liver donors are marginally older and have longer times from withdrawal of life-sustaining treatment to cold perfusion than in the US (6, 7, 9, 13, 14, 31). These differences are likely to reflect a wider acceptance of transplantation of DCD livers in the UK and that treatment withdrawal in the UK takes place in the intensive care unit or the anaesthetic room but not in theatre itself. However, cold ischaemic times are shorter for DCD livers in the UK, even taking into account differences in definitions between the two countries (6, 7, 13, 32). This may be due to geographical differences between the two countries (i.e. longer distances between procuring and implanting centres), or an increased willingness on the part of UK surgeons to begin the recipient operation before the organ arrives at the implanting centre.

Transplanted livers from DCD donors appear particularly susceptible to biliary complications, most commonly ischaemic cholangiopathy, which is thought to occur as a result of warm ischaemic

1  
2  
3 damage to the biliary epithelium sustained during the procurement process (10, 33-36). We examined  
4 rates of graft loss from biliary causes and found that this was a relatively rare cause of graft loss in  
5 DCD as well as in DBD recipients. In addition, there was no difference in the proportion of DCD and  
6 DBD recipients who required an intervention for biliary strictures. Although these findings concur  
7 with previous reports suggesting that ischaemic cholangiopathy is not a major problem in UK  
8 recipients of livers from DCD donors (26, 27), it should be recognised that analyses of national  
9 registry data are prone to under-reporting of post-operative complications.  
10  
11  
12  
13

14  
15 Unfortunately, data on time from withdrawal of life-sustaining treatment to cardiac arrest were  
16 missing in more than 50% of DCD donors, and therefore the impact of this variable on outcome was  
17 not assessed. Prolonged time from cardiac arrest to cold perfusion has been shown to be a risk factor  
18 for the development of ischaemic cholangiopathy (35), and would therefore be expected to lead to  
19 decreased graft survival. We found no significant association (data not shown). This is again likely to  
20 be due to lack of power or to most DCD donors having similar times, with an interquartile range of  
21 just 5 hours.  
22  
23  
24  
25  
26

27  
28 Defining acceptable warm ischaemic limits for livers from DCD donors is hampered by the lack of  
29 data on donor cardiorespiratory parameters after treatment withdrawal. Some controlled DCD donors  
30 have prolonged periods of cardiorespiratory stability before dying rapidly. It is therefore possible that  
31 the duration of hypotension or hypoxia has a greater impact on subsequent graft viability than the  
32 duration from treatment withdrawal to cardiac arrest or cold perfusion (8, 37). National prospective  
33 data collection of post-withdrawal cardiorespiratory parameters in Maastricht III DCD donors has  
34 therefore been initiated in both the UK and the US (8). Further research is also required into the  
35 impact of procurement techniques and preservation fluids on graft function (38), and the emerging  
36 role of machine perfusion (29).  
37  
38  
39  
40  
41  
42

43  
44 The allocation of deceased donor livers in the UK is currently on a local basis, with national organ  
45 sharing only for those patients with acute liver failure reaching specific criteria (20). Although local  
46 allocation reduces cold ischaemic time, which is an important risk factor for graft survival, the current  
47 system raises issues of equity of access to a national resource. The ultimate aim of our analyses of  
48 national data is to inform discussions on how best to utilise this resource (40). For example, one could  
49 use our results as further support for not using livers from DCD donors for patients with a low risk of  
50 death on the waiting list as these recipients are able to wait for a graft that is more likely to have a  
51 favourable long-term outcome. An exception could be made for patients with HCC. Although, these  
52 patients generally have low UKELD scores – indicating a low risk of mortality on the waiting list –  
53 they have a high risk of disease progression, which is an additional argument to use livers from DCD  
54 donors for this group.  
55  
56  
57  
58  
59  
60

1  
2  
3  
4 The relative benefit associated with transplantation of a DCD versus a DBD donor liver is expected to  
5 be dependent not only on donor and recipient factors, but also on the overall availability of donor  
6 livers within each region or country, the rate of deaths on the waiting list, and the impact of DCD  
7 transplantation on the subsequent need for re-transplantation (41). Allocation policies also need to  
8 determine whether DCD organs are to be distributed on the basis of utility, urgency, or overall  
9 survival benefit (42). Although livers transplanted from DCD donors have inferior outcomes to those  
10 from DBD donors, they remain a valuable additional source of grafts, especially in countries with  
11 relatively low rates of DBD organ donation.  
12  
13  
14  
15  
16  
17  
18  
19  
20  
21  
22  
23  
24  
25  
26  
27  
28  
29  
30  
31  
32  
33  
34  
35  
36  
37  
38  
39  
40  
41  
42  
43  
44  
45  
46  
47  
48  
49  
50  
51  
52  
53  
54  
55  
56  
57  
58  
59  
60

## Conflict of interest

None

## Contributorship

CJC, AEG, SCC and JvdM designed the study. SCC analysed the data. All authors contributed to the interpretation of the results. CJC wrote the first draft supported by SSC and JvdM; All authors commented on later drafts. JvdM is guarantor.

## Acknowledgements

The authors would like to thank all seven UK liver transplant centres for providing data to the UK Liver Transplant Audit. We would also like to thank all those involved in collecting and handling liver transplant data at the National Health Service Blood and Transplant authority, and Kerri Barber, lead liver transplant statistician at the authority.

## Funding

Supported by the NHS National Specialised Commissioning Group.



## References

- 1  
2  
3  
4  
5  
6  
7  
8  
9  
10  
11  
12  
13  
14  
15  
16  
17  
18  
19  
20  
21  
22  
23  
24  
25  
26  
27  
28  
29  
30  
31  
32  
33  
34  
35  
36  
37  
38  
39  
40  
41  
42  
43  
44  
45  
46  
47  
48  
49  
50  
51  
52  
53  
54  
55  
56  
57  
58  
59  
60
- (1) Kootstra G, Daemen JH, Oomen AP. Categories of non-heart-beating donors. *Transplantation proceedings*. 1995 Oct;27(5):2893-4.
- (2) Jimenez-Galanes S, Meneu-Diaz MJ, Elola-Olaso AM, et al. Liver transplantation using uncontrolled non-heart-beating donors under normothermic extracorporeal membrane oxygenation. *Liver Transpl*. 2009 Sep;15(9):1110-8.
- (3) Thuluvath PJ, Guidinger MK, Fung JJ, Johnson LB, Rayhill SC, Pelletier SJ. Liver transplantation in the United States, 1999-2008. *Am J Transplant*. 2010 Apr;10(4 Pt 2):1003-19.
- (4) Dominguez-Gil B, Haase-Kromwijk B, Van Leiden H, et al. Current situation of donation after circulatory death in European countries. *Transpl Int*. 2011 Jul;24(7):676-86.
- (5) Abt PL, Desai NM, Crawford MD, et al. Survival following liver transplantation from non-heart-beating donors. *Ann Surg*. 2004 Jan;239(1):87-92.
- (6) Mateo R, Cho Y, Singh G, et al. Risk factors for graft survival after liver transplantation from donation after cardiac death donors: an analysis of OPTN/UNOS data. *Am J Transplant*. 2006 Apr;6(4):791-6.
- (7) Lee KW, Simpkins CE, Montgomery RA, Locke JE, Segev DL, Maley WR. Factors affecting graft survival after liver transplantation from donation after cardiac death donors. *Transplantation*. 2006 Dec 27;82(12):1683-8.
- (8) Mathur AK, Heimbach J, Steffick DE, Sonnenday CJ, Goodrich NP, Merion RM. Donation after cardiac death liver transplantation: predictors of outcome. *Am J Transplant*. 2010 Nov;10(11):2512-9.
- (9) Jay C, Skaro A, Ladner D, et al. A comprehensive risk assessment of mortality following donation after cardiac death liver transplant - An analysis of the national registry. *J Hepatol*. 2011;44(4):808-13.
- (10) Jay CL, Lyuksemburg V, Ladner DP, et al. Ischemic cholangiopathy after controlled donation after cardiac death liver transplantation: a meta-analysis. *Ann Surg*. 2011 Feb;253(2):259-64.
- (11) Renz JF. Is DCD for liver transplantation DNR? *Am J Transplant*. 2008 Mar;8(3):485-8.
- (12) Muiesan P, Girlanda R, Jassem W, et al. Single-center experience with liver transplantation from controlled non-heartbeating donors: a viable source of grafts. *Ann Surg*. 2005 Nov;242(5):732-8.
- (13) Merion RM, Pelletier SJ, Goodrich N, Englesbe MJ, Delmonico FL. Donation after cardiac death as a strategy to increase deceased donor liver availability. *Ann Surg*. 2006 Oct;244(4):555-62.
- (14) NHS Blood and Transplant. *Transplant activity in the UK; 2008*.
- (15) <http://www.rcseng.ac.uk/surgeons/research/surgical-research/docs/uk-liver-transplant-audit-report-2011>. Accessed 14 August 2012.

- 1  
2  
3 (16) Hartley P, Petruckevitch A, Reeves B, Rolles K. The National Liver Transplantation audit: an  
4 overview of patients presenting for liver transplantation from 1994 to 1998. On behalf of the Steering  
5 Group of the UK Liver Transplantation Audit. *Br J Surg*. 2001 Jan;88(1):52-8.  
6  
7 (17) Jacob M, Copley LP, Lewsey JD, et al. Pretransplant MELD score and post liver  
8 transplantation survival in the UK and Ireland. *Liver Transpl*. 2004 Jul;10(7):903-7.  
9  
10 (18) van der Meulen JH, Jacob M, Copley L. Assessing the quality of the data in a transplant  
11 registry: the European Liver Transplant Registry. *Transplantation*. 2003 Jun 27;75(12):2164-7.  
12  
13 (19) Reich DJ, Mulligan DC, Abt PL, et al. ASTS recommended practice guidelines for controlled  
14 donation after cardiac death organ procurement and transplantation. *Am J Transplant*. 2009  
15 Sep;9(9):2004-11.  
16  
17 (20) Neuberger J, Gimson A, Davies M, et al. Selection of patients for liver transplantation and  
18 allocation of donated livers in the UK. *Gut*. 2008 Feb;57(2):252-7.  
19  
20 (21) Barber K, Madden S, Allen J, Collett D, Neuberger J, Gimson A. Elective liver transplant list  
21 mortality: Development of a United Kingdom End-Stage Liver Disease score. *Transplantation*. 2011  
22 Jul 19;92(4):469-76.  
23  
24 (22) Kamath PS, Wiesner RH, Malinchoc M, et al. A model to predict survival in patients with  
25 end-stage liver disease. *Hepatology*. 2001 Feb;33(2):464-70.  
26  
27 (23) Rosenbaum PR, Rubin DB. Reducing bias in observational studies using subclassification on  
28 the the propensity score. *J Am Stat Assoc* 1984;79:516-24.  
29  
30 (24) Austin PC, Mamdani MM. A comparison of propensity score methods: a case-study  
31 estimating the effectiveness of post-AMI statin use. *Stat Med*. 2006 Jun 30;25(12):2084-106.  
32  
33 (25) White IR, Royston P, Wood AM. Multiple imputation using chained equations: Issues and  
34 guidance for practice. *Stat Med*. 2011 Feb 20;30(4):377-99.  
35  
36 (26) Tariciotti L, Rocha C, Perera MT, et al. Is it time to extend liver acceptance criteria for  
37 controlled donors after cardiac death? *Transplantation*. 2011 Nov 27;92(10):1140-6.  
38  
39 (27) Deoliveira ML, Jassem W, Valente R, et al. Biliary complications after liver transplantation  
40 using grafts from donors after cardiac death: results from a matched control study in a single large  
41 volume center. *Ann Surg*. 2011 Nov;254(5):716-23.  
42  
43 (28) Mallik M, Callaghan CJ, Hope M, et al. Comparison of liver transplantation outcomes from  
44 adult split liver and circulatory death donors. *Br J Surg*. 2012 Jun;99(6):839-47.  
45  
46 (29) Grewal HP, Willingham DL, Nguyen J, et al. Liver transplantation using controlled donation  
47 after cardiac death donors: an analysis of a large single-center experience. *Liver Transpl*. 2009  
48 Sep;15(9):1028-35.  
49  
50 (30) Pine JK, Aldouri A, Young AL, et al. Liver transplantation following donation after cardiac  
51 death: an analysis using matched pairs. *Liver Transpl*. 2009 Sep;15(9):1072-82.  
52  
53 (31) Feng S, Goodrich NP, Bragg-Gresham JL, et al. Characteristics associated with liver graft  
54 failure: the concept of a donor risk index. *Am J Transplant*. 2006 Apr;6(4):783-90.  
55  
56  
57  
58  
59  
60

- 1  
2  
3  
4  
5  
6  
7  
8  
9  
10  
11  
12  
13  
14  
15  
16  
17  
18  
19  
20  
21  
22  
23  
24  
25  
26  
27  
28  
29  
30  
31  
32  
33  
34  
35  
36  
37  
38  
39  
40  
41  
42  
43  
44  
45  
46  
47  
48  
49  
50  
51  
52  
53  
54  
55  
56  
57  
58  
59  
60
- (32) Berg CL, Steffick DE, Edwards EB, et al. Liver and intestine transplantation in the United States 1998-2007. *Am J Transplant*. 2009 Apr;9(4 Pt 2):907-31.
- (33) Abt P, Crawford M, Desai N, Markmann J, Olthoff K, Shaked A. Liver transplantation from controlled non-heart-beating donors: an increased incidence of biliary complications. *Transplantation*. 2003 May 27;75(10):1659-63.
- (34) Foley DP, Fernandez LA, Levenson G, et al. Biliary complications after liver transplantation from donation after cardiac death donors: an analysis of risk factors and long-term outcomes from a single center. *Ann Surg*. 2011 Apr;253(4):817-25.
- (35) Taner CB, Bulatao IG, Willingham DL, et al. Events in procurement as risk factors for ischemic cholangiopathy in liver transplantation using donation after cardiac death donors. *Liver Transpl*. 2011 Aug 11.
- (36) Chan EY, Olson LC, Kisthard JA, et al. Ischemic cholangiopathy following liver transplantation from donation after cardiac death donors. *Liver Transpl*. 2008 May;14(5):604-10.
- (37) Ho KJ, Owens CD, Johnson SR, et al. Donor postextubation hypotension and age correlate with outcome after donation after cardiac death transplantation. *Transplantation*. 2008 Jun 15;85(11):1588-94.
- (38) Brockmann JG, Vaidya A, Reddy S, Friend PJ. Retrieval of abdominal organs for transplantation. *Br J Surg*. 2006 Feb;93(2):133-46.
- (39) de Rougemont O, Breitenstein S, Leskosek B, et al. One hour hypothermic oxygenated perfusion (HOPE) protects nonviable liver allografts donated after cardiac death. *Ann Surg*. 2009 Nov;250(5):674-83.
- (40) Morris PJ, Johnson RJ, Fuggle SV, Belger MA, Briggs JD. Analysis of factors that affect outcome of primary cadaveric renal transplantation in the UK. HLA Task Force of the Kidney Advisory Group of the United Kingdom Transplant Support Service Authority (UKTSSA). *Lancet*. 1999 Oct 2;354(9185):1147-52.
- (41) Selck FW, Grossman EB, Ratner LE, Renz JF. Utilization, outcomes, and retransplantation of liver allografts from donation after cardiac death: implications for further expansion of the deceased-donor pool. *Ann Surg*. 2008 Oct;248(4):599-607.
- (42) Merion RM, Sharma P, Mathur AK, Schaubel DE. Evidence-based development of liver allocation: a review. *Transpl Int*. 2011 Oct;24(10):965-72.

**Figure 1** - Graft survival after first elective adult liver transplantation using livers from donation after circulatory death (DCD) donors and donation after brain death (DBD) donors.

**Graft failure**

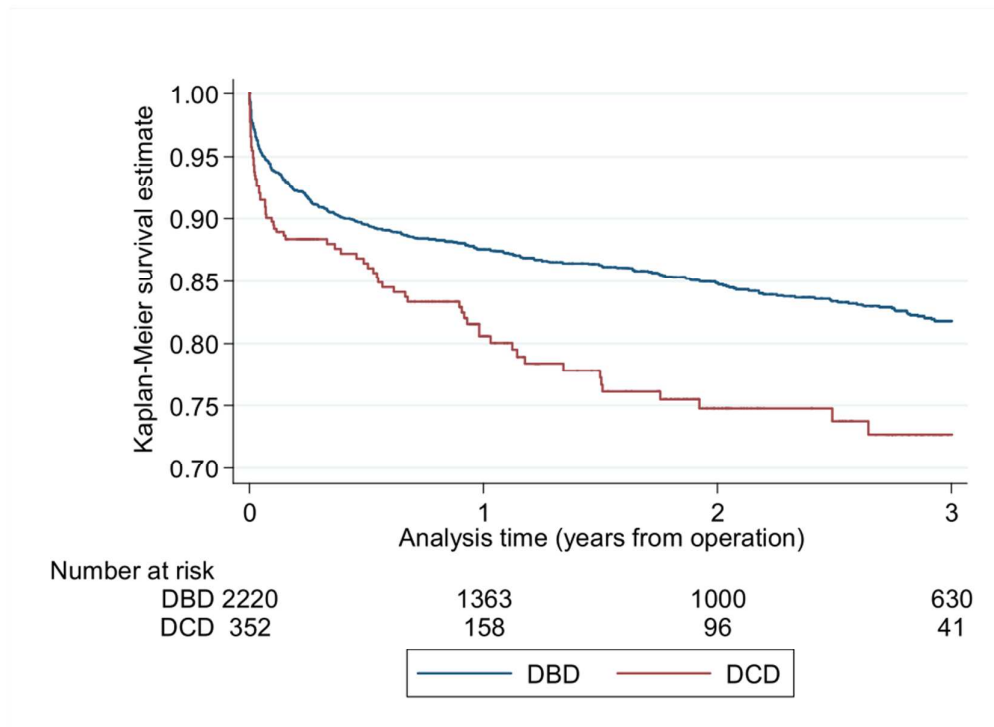

**Recipient mortality**



**Figure 2** - Centre specific hazard ratios (HR) and 95% CI comparing three-year graft loss (top figure) and recipient mortality (bottom figure). HRs greater than 1 indicate that risks of loss or mortality are greater with DCD than with DBD livers.

**Graft failure**

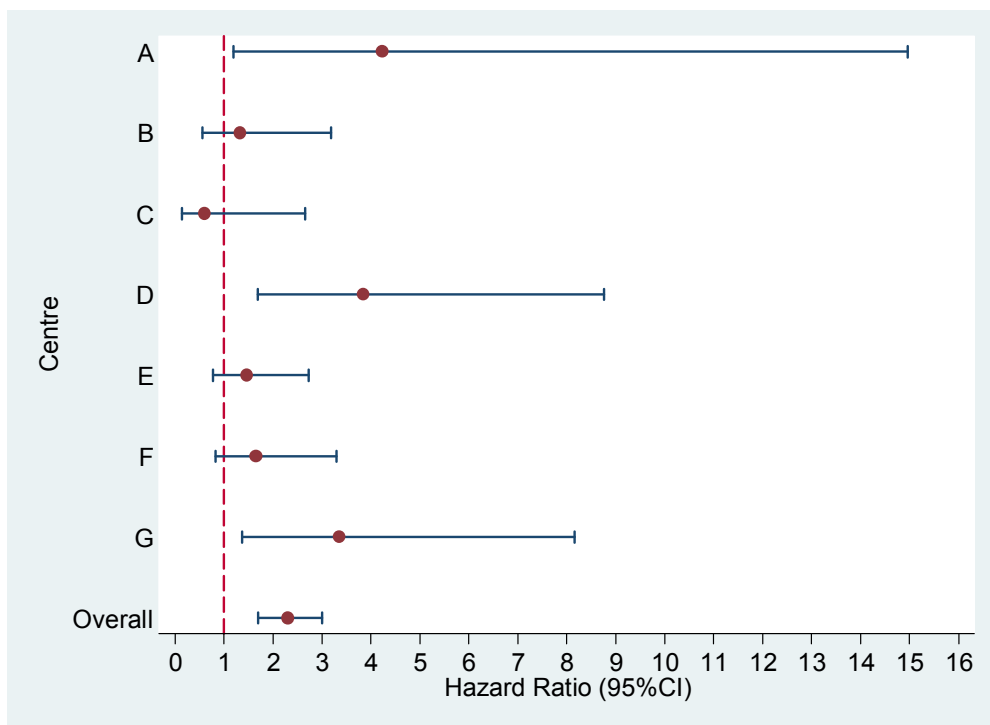

**Recipient mortality**

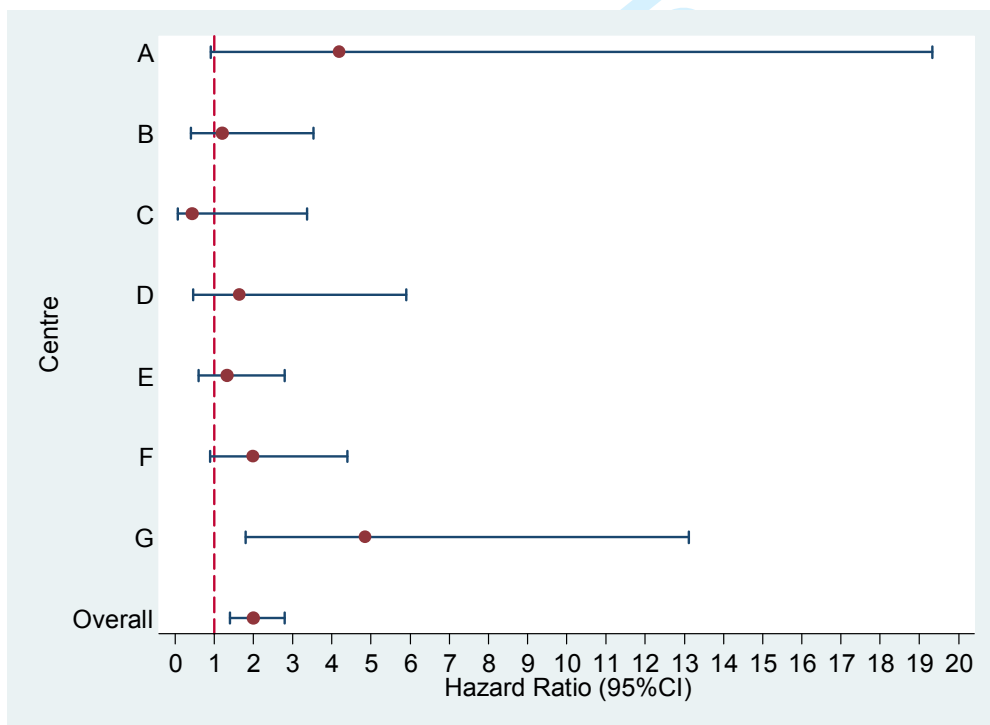

**Table 1** - Donor characteristics by donor type.

| <b>Liver donor type</b>     | DCD (n=352)      | DBD (n=2,220)    | p-value | Missing (n) |
|-----------------------------|------------------|------------------|---------|-------------|
| <b>Donor characteristic</b> |                  |                  |         |             |
| Age, years                  | 42 (16)          | 46 (15)          | <0.01   | 0           |
| Male sex                    | 206 (59)         | 1,158 (52)       | 0.03    | 0           |
| BMI, kg/m <sup>2</sup>      | 25 (4)           | 26 (7)           | <0.01   | 20          |
| Serum sodium, mmol/L        | 144 (140 to 150) | 147 (142 to 154) | <0.01   | 4           |
| Diabetes                    | 14 (5)           | 111 (5)          | 0.93    | 154         |
| Organ appearance            |                  |                  |         |             |
| Healthy                     | 176 (70)         | 1,384 (76)       | 0.05    | 497         |
| Suboptimal                  | 75 (30)          | 440 (24)         |         |             |
| Cause of death              |                  |                  |         |             |
| Trauma                      | 81 (23)          | 256 (12)         | <0.01   | 23          |
| Stroke                      | 173 (50)         | 1,546 (70)       |         |             |
| Anoxia                      | 54 (16)          | 198 (9)          |         |             |
| Other                       | 37 (11)          | 204 (9)          |         |             |

Values are numbers (percentages) for categorical variables and means (standard deviations) or median (interquartile range) otherwise. DBD - donation after brain death; DCD - donation after circulatory death.

**Table 2** - Recipient and operative characteristics by donor type.

| <b>Liver donor type</b>                        | DCD (n=352)      | DBD (n=2,220)    | p-value | Missing (n) |
|------------------------------------------------|------------------|------------------|---------|-------------|
| <b>Recipient and operative characteristics</b> |                  |                  |         |             |
| Age, years                                     | 53(9)            | 52 (11)          | 0.02    | 0           |
| Male sex                                       | 247 (70)         | 1,436 (65)       | 0.04    | 0           |
| BMI, kg/m <sup>2</sup>                         | 27(5)            | 27 (6)           | 0.94    | 12          |
| Serum sodium, mmol/L                           | 137 (134 to 140) | 137 (134 to 140) | 0.38    | 7           |
| Serum potassium, mmol/L                        | 4.2 (0.5)        | 4.2 (0.5)        | 0.23    | 52          |
| Serum creatinine, µmol/L                       | 89 (72 to 109)   | 86(72 to 104)    | 0.92    | 4           |
| Serum albumin, g/L                             | 32 (28 to 37)    | 32 (27 to 36)    | 0.40    | 14          |
| Serum bilirubin, mmol/L                        | 41(21 to 79)     | 47 (24 to 100)   | <0.01   | 8           |
| INR                                            | 1.4 (1.2 to 1.6) | 1.4 (1.2 to 1.6) | 0.90    | 54          |
| UKELD score                                    | 54 (50 to 57)    | 55 (51 to 59)    | <0.01   | 57          |
| MELD score                                     | 15 (11 to 19)    | 15 (12 to 20)    | 0.04    | 57          |
| <b>Primary liver disease</b>                   |                  |                  |         |             |
| Cancer                                         | 118 (33)         | 461 (21)         | <0.01   | 0           |
| HCV                                            | 47 (13)          | 265 (12)         |         |             |
| PSC                                            | 23 (7)           | 233 (10)         |         |             |
| HBV                                            | 6 (2)            | 52 (2)           |         |             |
| PBC                                            | 34 (10)          | 238 (11)         |         |             |
| ALD                                            | 71 (20)          | 516 (23)         |         |             |
| AID                                            | 22 (6)           | 193 (9)          |         |             |
| Metabolic                                      | 15 (4)           | 86 (4)           |         |             |
| Other                                          | 16 (5)           | 176 (8)          |         |             |
| <b>Previous abdominal surgery</b>              |                  |                  |         |             |
| No                                             | 315 (90)         | 1,931 (87)       | 0.15    | 10          |
| Yes                                            | 35 (10)          | 281 (13)         |         |             |
| <b>Inpatient &amp; ventilatory status</b>      |                  |                  |         |             |
| Outpatient                                     | 313 (89)         | 1,877 (85)       | 0.10    | 0           |
| Inpatient, not ventilated                      | 36(10)           | 322 (14)         |         |             |
| Ventilated                                     | 3 (1)            | 21 (1)           |         |             |
| Days in intensive care                         | 2 (1,4)          | 2 (1,4)          | 0.38    | 15          |
| <b>Pre-operative renal support</b>             |                  |                  |         |             |
| No                                             | 333 (95)         | 2,116 (96)       | 0.71    | 7           |
| Yes                                            | 18 (5)           | 98 (4)           |         |             |

|    |                            |                  |                   |       |    |
|----|----------------------------|------------------|-------------------|-------|----|
| 1  | Organ type                 |                  |                   |       |    |
| 2  | Whole                      | 343 (97)         | 1,956 (88)        | <0.01 | 1  |
| 3  |                            |                  |                   |       |    |
| 4  | Partial                    | 9 (3)            | 263 (12)          |       |    |
| 5  | Cold ischaemic time, hours | 6.7 (5.6 to 8.0) | 9.5 (7.8 to 11.1) | <0.01 | 93 |
| 6  |                            |                  |                   |       |    |
| 7  | Anastomosis time, mins     | 41 (35 to 50)    | 42 (36 to 51)     | 0.42  | 90 |
| 8  |                            |                  |                   |       |    |
| 9  | Ethnicity mismatch         |                  |                   |       |    |
| 10 | No                         | 272 (77)         | 1,868 (84)        | <0.01 | 10 |
| 11 |                            |                  |                   |       |    |
| 12 | Yes                        | 79 (22)          | 343 (15)          |       |    |

14 Values are numbers (percentages) for categorical variables and means (standard deviations) or median  
 15 (interquartile range) otherwise. DBD - donation after brain death; DCD - donation after circulatory death; HCV  
 16 – hepatitis C virus; PSC – primary sclerosing cholangitis; HBV – hepatitis B virus; PBC – primary biliary  
 17 – hepatitis C virus; PSC – primary sclerosing cholangitis; HBV – hepatitis B virus; PBC – primary biliary  
 18 cirrhosis; ALD – alcoholic liver disease; AID – autoimmune disease.



**Table 3** - Recipient 3-year graft loss and mortality by donor type. Hazard ratios (HR) are unadjusted or adjusted based on either a multivariable Cox regression model or propensity score matching.

| Liver donor type                       | Unadjusted HR<br>(95% CI) | Adjusted HR (95% CI)   |                              |                  |
|----------------------------------------|---------------------------|------------------------|------------------------------|------------------|
|                                        |                           | Multivariable<br>model | Propensity score<br>analysis |                  |
| <b>3-year graft loss %</b><br>(95% CI) |                           |                        |                              |                  |
| Donation after circulatory death       | 27.3 (21.8 to 33.9)       | 1.6 (1.2 to 2.0)       | 2.3 (1.7 to 3.0)             | 2.3 (1.3 to 4.1) |
| Donation after brain death             | 18.2 (16.4 to 20.2)       | 1                      | 1                            | 1                |
| <b>3-year mortality %</b><br>(95% CI)  |                           |                        |                              |                  |
| Donation after circulatory death       | 19.4 (14.5 to 25.6)       | 1.4 (1.1 to 2.0)       | 2.0 (1.4 to 2.8)             | 2.0 (1.0 to 4.2) |
| Donation after brain death             | 14.1 (12.5 to 16.0)       | 1                      | 1                            | 1                |

# Outcomes of transplantation of livers from donation after circulatory death donors in the UK

STROBE Statement—Checklist of items that should be included in reports of *cohort studies*

|                           | Item No | Recommendation                                                                                                                                                                       |                                                                                                                |
|---------------------------|---------|--------------------------------------------------------------------------------------------------------------------------------------------------------------------------------------|----------------------------------------------------------------------------------------------------------------|
| <b>Title and abstract</b> | 1       | (a) Indicate the study's design with a commonly used term in the title or the abstract                                                                                               | Page 2, Methods paragraph                                                                                      |
|                           |         | (b) Provide in the abstract an informative and balanced summary of what was done and what was found                                                                                  | Page 2, Results and Conclusion paragraphs                                                                      |
| <b>Introduction</b>       |         |                                                                                                                                                                                      |                                                                                                                |
| Background/rationale      | 2       | Explain the scientific background and rationale for the investigation being reported                                                                                                 | Page 4, first three paragraphs of Introduction                                                                 |
| Objectives                | 3       | State specific objectives, including any prespecified hypotheses                                                                                                                     | Page 4, last paragraph of Introduction                                                                         |
| <b>Methods</b>            |         |                                                                                                                                                                                      |                                                                                                                |
| Study design              | 4       | Present key elements of study design early in the paper                                                                                                                              | Page 5, first paragraph of Methods                                                                             |
| Setting                   | 5       | Describe the setting, locations, and relevant dates, including periods of recruitment, exposure, follow-up, and data collection                                                      | Ibidem                                                                                                         |
| Participants              | 6       | (a) Give the eligibility criteria, and the sources and methods of selection of participants. Describe methods of follow-up                                                           | Page 5, second and third paragraph of Methods                                                                  |
|                           |         | (b) For matched studies, give matching criteria and number of exposed and unexposed                                                                                                  | N/A                                                                                                            |
| Variables                 | 7       | Clearly define all outcomes, exposures, predictors, potential confounders, and effect modifiers. Give diagnostic criteria, if applicable                                             | Page 5 – 7, Statistical analysis section in Methods                                                            |
| Data sources/measurement  | 8*      | For each variable of interest, give sources of data and details of methods of assessment (measurement). Describe comparability of assessment methods if there is more than one group | Page 5, first paragraph in Methods                                                                             |
| Bias                      | 9       | Describe any efforts to address potential sources of bias                                                                                                                            | Page 5-7 in Methods section describing the multivariable regression analysis and the propensity score matching |
| Study size                | 10      | Explain how the study size was arrived at                                                                                                                                            | Page 5, first paragraph of Methods                                                                             |
| Quantitative variables    | 11      | Explain how quantitative variables were handled in the analyses. If applicable, describe which groupings were chosen and why                                                         | Page 5, second paragraph of                                                                                    |

|                     |     |                                                                                                                                                                                                              | Methods                                                                     |
|---------------------|-----|--------------------------------------------------------------------------------------------------------------------------------------------------------------------------------------------------------------|-----------------------------------------------------------------------------|
| Statistical methods | 12  | (a) Describe all statistical methods, including those used to control for confounding                                                                                                                        | Page 5 – 7, Statistical analysis section in Methods                         |
|                     |     | (b) Describe any methods used to examine subgroups and interactions                                                                                                                                          | Ibidem                                                                      |
|                     |     | (c) Explain how missing data were addressed                                                                                                                                                                  | Page 7, last paragraph of methods section                                   |
|                     |     | (d) If applicable, explain how loss to follow-up was addressed                                                                                                                                               | N/A                                                                         |
|                     |     | (e) Describe any sensitivity analyses                                                                                                                                                                        | N/A                                                                         |
| <b>Results</b>      |     |                                                                                                                                                                                                              |                                                                             |
| Participants        | 13* | (a) Report numbers of individuals at each stage of study—eg numbers potentially eligible, examined for eligibility, confirmed eligible, included in the study, completing follow-up, and analysed            | Page 8, first paragraph of Results                                          |
|                     |     | (b) Give reasons for non-participation at each stage                                                                                                                                                         | N/A                                                                         |
|                     |     | (c) Consider use of a flow diagram                                                                                                                                                                           | Not used                                                                    |
| Descriptive data    | 14* | (a) Give characteristics of study participants (eg demographic, clinical, social) and information on exposures and potential confounders                                                                     | Page 8, second and third paragraph of Results                               |
|                     |     | (b) Indicate number of participants with missing data for each variable of interest                                                                                                                          | Page 19 and 20, Table 1 and 2                                               |
|                     |     | (c) Summarise follow-up time (eg, average and total amount)                                                                                                                                                  | Not done as we have near complete follow-up                                 |
| Outcome data        | 15* | Report numbers of outcome events or summary measures over time                                                                                                                                               | Page 22, Table 3 and Page 17, Figure 1                                      |
| Main results        | 16  | (a) Give unadjusted estimates and, if applicable, confounder-adjusted estimates and their precision (eg, 95% confidence interval). Make clear which confounders were adjusted for and why they were included | Page 22, Table 3                                                            |
|                     |     | (b) Report category boundaries when continuous variables were categorized                                                                                                                                    | N/A                                                                         |
|                     |     | (c) If relevant, consider translating estimates of relative risk into absolute risk for a meaningful time period                                                                                             | N/A                                                                         |
| Other analyses      | 17  | Report other analyses done—eg analyses of subgroups and interactions, and sensitivity analyses                                                                                                               | Page 9, centre-specific estimates, penultimate paragraph of Results section |
| <b>Discussion</b>   |     |                                                                                                                                                                                                              |                                                                             |
| Key results         | 18  | Summarise key results with reference to study objectives                                                                                                                                                     | Page 10, first paragraph of Discussion                                      |
| Limitations         | 19  | Discuss limitations of the study, taking into account sources of potential bias or imprecision. Discuss both direction and                                                                                   | Page 11, second and third                                                   |

|                          |    |                                                                                                                                                                            |                                                            |
|--------------------------|----|----------------------------------------------------------------------------------------------------------------------------------------------------------------------------|------------------------------------------------------------|
|                          |    | magnitude of any potential bias                                                                                                                                            | paragraph,<br>Discussion                                   |
| Interpretation           | 20 | Give a cautious overall interpretation of results considering objectives, limitations, multiplicity of analyses, results from similar studies, and other relevant evidence | Page 10, second paragraph and fourth paragraph, Discussion |
| Generalisability         | 21 | Discuss the generalisability (external validity) of the study results                                                                                                      | Page 10, fourth paragraph                                  |
| <b>Other information</b> |    |                                                                                                                                                                            |                                                            |
| Funding                  | 22 | Give the source of funding and the role of the funders for the present study and, if applicable, for the original study on which the present article is based              | Page 13, Acknowledgements                                  |

\*Give information separately for exposed and unexposed groups.

**Note:** An Explanation and Elaboration article discusses each checklist item and gives methodological background and published examples of transparent reporting. The STROBE checklist is best used in conjunction with this article (freely available on the Web sites of PLoS Medicine at <http://www.plosmedicine.org/>, Annals of Internal Medicine at <http://www.annals.org/>, and Epidemiology at <http://www.epidem.com/>). Information on the STROBE Initiative is available at <http://www.strobe-statement.org>.

## Original article

# Outcomes of transplantation of livers from donation after circulatory death donors in the UK

Christopher J Callaghan<sup>1</sup>, Susan C Charman<sup>2,3</sup>, Paolo Muiesan<sup>4</sup>, James J Powell<sup>5</sup>, Alexander E Gimson<sup>1</sup>, Jan HP van der Meulen<sup>2,3</sup>, on behalf of the UK Liver Transplant Audit

22 May 2013

### Authors' affiliations

1. Cambridge Transplant Centre, Addenbrooke's Hospital, Cambridge, UK
2. Clinical Effectiveness Unit, Royal College of Surgeons of England, London, UK
3. Department of Health Services Research and Policy, London School of Hygiene and Tropical Medicine, London, UK
4. Department of Liver Transplantation and Hepatopancreatobiliary Surgery, Queen Elizabeth Hospital, Birmingham, UK
5. Scottish Liver Transplant Unit, Royal Infirmary of Edinburgh, Edinburgh, UK

### Corresponding author

Jan van der Meulen  
Professor of Clinical Epidemiology  
Department of Health Services Research and Policy  
London School of Hygiene and Tropical Medicine  
15 – 17 Tavistock Place  
London WC1H 9SH  
United Kingdom  
Email: [jan.vandermeulen@lshtm.ac.uk](mailto:jan.vandermeulen@lshtm.ac.uk)

**Key words:** liver transplantation, donation after circulatory death, mortality, graft loss

### Word count:

**Abstract:** 248

**Text:** 2917

**Tables:** 3

**Figures:** 2

## Abstract

**Objectives:** Outcomes of liver transplantations from donation after circulatory death (DCD) donors may be inferior to those achieved with donation after brain death (DBD) donors. The impact of using DCD donors is likely to depend on specific national practices. We compared risk-adjusted graft loss and recipient mortality after transplantation of DCD and DBD livers in the UK.

**Design:** Prospective cohort study. Multivariable Cox regression and propensity score matching were used to estimate risk-adjusted hazard ratios (HR).

**Setting:** Seven liver transplant centres in NHS hospitals in England and Scotland.

**Participants:** Adults who received a first elective liver transplant between January 2005 and December 2010 who were identified in the UK Liver Transplant Audit.

**Interventions:** Transplantation of DCD and DBD livers.

**Outcomes:** Graft loss and recipient mortality.

**Results:** In total, 2572 liver transplants were identified with 352 (14%) from DCD donors. Three-year graft loss (95% CI) was higher with DCD livers (27.3%; 21.8% to 33.9%) than with DBD livers (18.2%; 16.4% to 20.2%). After adjustment with regression, the HR for graft loss was 2.3 (1.7 to 3.0). Similarly, three-year mortality was higher with DCD livers (19.4%; 14.5% - 25.6%) than with DBD livers (14.1%; 12.5% to 16.0%) with an adjusted HR of 2.0 (1.4 to 2.8). Propensity score matching gave similar results. Centre-specific adjusted HRs for graft loss and recipient mortality seemed to differ among transplant centres, although statistical evidence is weak (p-value for interaction 0.08 and 0.24, respectively).

**Conclusions:** Graft loss and recipient mortality were about twice as high with DCD livers as with DBD livers in the UK. Outcomes after DCD liver transplantation may vary between centres. These results should inform policies for use of DCD livers.

## Article Summary

### Article focus

- There is increasing disparity between demand and supply of donor livers for transplantation.
- The use of livers from donation after circulatory death (DCD) donors – in addition to those from donation after brain death (DBD) - increases the donor pool.
- We compared graft loss and recipient mortality after transplantation of DCD and DBD livers in the UK.

### Key messages

- Recipients of DCD livers, after risk-adjustment, have approximately twice the risk of graft loss and death within 3 years of transplantation than recipients of livers from DBD donors.
- The impact of using DCD livers on graft loss and recipient mortality seemed to differ among the seven UK transplant centres.

### Strengths and limitations of this study

- A national database was used with near complete inclusion of all liver transplantations in the UK with high data quality and follow-up, which eliminates the risk of selective reporting.
- Both multivariable regression analysis and propensity score matching were used to adjust for differences risk factors for graft loss and patient mortality between DBD and DCD donors and recipients.
- We were not able to assess the impact that time from withdrawal of life-sustaining treatment to cardiac arrest has on post-transplant outcomes of DCD livers.

## Introduction

The increasing disparity between the demand and supply of donor livers is a major challenge. The need to increase the donor pool, and improve organ utilisation, has led to the re-introduction and rapid expansion of the use of livers from donation after circulatory death (DCD) donors. These donors have been classified as either uncontrolled, where cardiac arrest has occurred unexpectedly (Maastricht categories I and II), or controlled, where potential donors have life-sustaining treatment withdrawn after further interventions are deemed futile (Maastricht III), or circulatory death occurs in a donation after brain death (DBD) donor (Maastricht IV) (1).

Unlike DBD donors, livers from DCD donors undergo a variable period of warm ischaemia, during which irreversible cellular damage may occur. Reliably measuring the warm ischaemic period is difficult outside of hospital, which means that the use of livers from uncontrolled DCD donors is limited (2). In contrast, planned withdrawal of life-sustaining treatment in Maastricht III donors enables close cardiorespiratory monitoring, provision of a prepared procurement team, and minimisation of subsequent warm ischaemia. As such, the use of livers from controlled DCD donors has risen dramatically in the US (3) and Europe (4).

US registry analyses have demonstrated that DCD liver transplantation has worse graft and patient survival than DBD liver transplantation (5-9). This is thought to be predominantly due to a higher rate of biliary complications in DCD livers rather than other causes of graft loss (10). Recognition of these issues has perhaps contributed to a recent drop in the number of DCD livers transplanted in the US (3, 11). However, as a result of encouraging early reports (12) and decreasing DBD liver transplantation rates, the use of DCD livers in the UK is now more widespread than the US.

As there are differences between UK and US practice with respect to how DCD livers are being used (13, 14), we report in this paper graft loss and recipient mortality after transplantation of DCD and DBD livers in the UK. Two risk-adjustment techniques were used to control for differences in donor and recipient risk factors.



## Materials and methods

### Inclusion criteria

Using data submitted to the UK Liver Transplant Audit (15) we identified all adult patients (age >16 years) receiving a first liver transplant in the seven UK transplant centres in the UK between 1 January 2005 and 31 December 2010. Follow-up ceased on 31 March 2011. Regular checks show that data are consistently both more than 93% complete and accurate (16-18). Patients receiving living or domino donors were excluded, as were those having an emergency ('super-urgent' (19)) or multi-organ transplant. We are not aware of any uncontrolled DCD liver transplants having been performed in the UK during the study period.

### Donor and recipient selection and organ procurement

Criteria for DCD donor selection and acceptable post-withdrawal haemodynamic parameters varied among the liver transplant centres, but were broadly based on the experience of Muiesan et al (12), and in line with US guidelines (19). Administration of heparin or vasodilators, or pre-dissection of femoral vessels before death, is prohibited by law in the UK. Death was declared after cardiorespiratory arrest with a minimum interval of five minutes. All UK liver procurement centres used a super-rapid recovery technique (19), although preservation fluid type, bag pressure, and the use of dual perfusion techniques varied.

Livers from DCD and DBD donors were allocated locally, and centres chose recipients according to local criteria (20). Optimal livers from DBD donors were offered to paediatric centres for splitting and implantation of the left lateral segment, with implantation of the extended right lobe into an adult recipient.

### Statistical analyses

Pearson's chi-squared test was used to test differences of categorical variables and Student's t-test or Mann Whitney test for differences of continuous variables. Graft and recipient survival after transplantation were estimated using Kaplan-Meier methods. Graft loss was defined as re-transplantation or death, regardless of perceived graft function at the time of death. Cold ischaemic time was defined as the duration from the start of cold perfusion of the liver in the donor to organ removal from ice immediately prior to implantation.

A multivariable Cox regression model was used to adjust the comparisons of graft loss and recipient mortality between DCD and DBD livers for differences in risk factors at the time of transplantation. The donor, recipient and operative characteristics presented in Table 1 and 2 were included in the model (see Table 1 and 2). United Kingdom End-Stage Liver Disease (UKELD) and Model for End-

1  
2  
3 Stage Liver Disease (MELD) scores were calculated for recipients (21, 22), but these scores were not  
4 incorporated in the multivariable model as the component variables of both were already included.  
5  
6

7  
8 To test whether the impact of using DCD livers on graft loss and patient mortality varied among UK  
9 transplant centre, we included an interaction term of donor type and centre in the Cox model. The  
10 likelihood ratio test was used to test the statistical significance of the risk factors. The results of the  
11 survival analyses are presented as hazard ratios (HR) with 95% confidence intervals (CI).  
12  
13

14  
15 An analysis with propensity score matching was also conducted. The propensity score is the  
16 probability that a recipient would have received a liver from a DCD (as opposed to a DBD) donor,  
17 based on observed donor and recipient characteristics. A logistic regression model was used to  
18 generate the propensity score (23). Donor type was regressed on main effects only and donor,  
19 recipient and operative characteristics were selected using a stepwise process with conservative  
20 removal ( $p > 0.20$ ) and entry criteria ( $p < 0.10$ ). We considered all two-way interactions of the main  
21 effects and explored non-linear relationships by including quadratic terms of continuous model  
22 factors. All interactions and quadratic terms with a  $p < 0.05$  were selected. We estimated the  
23 propensity score based on the logistic regression model as the sum of the products of the model  
24 factors and their coefficients. Then, for each recipient in the DCD group we selected an individual  
25 from the DBD group by matching on the log of the estimated propensity score, using a nearest-  
26 neighbour matching algorithm with callipers (an interval) of maximum width of 0.2 standard  
27 deviations. We compared the distribution of all model factors in the DCD and DBD groups to assess  
28 the success of the propensity score model. The above processes were repeated for each of the ten  
29 imputed data sets (see below for a description of methods to deal with missing data). The balance in  
30 the covariates across the treatment groups was considered to be achieved if the standardised  
31 differences were less than 10%. (24). Cox regression was then performed on each of the ten sets of  
32 matched pairs to estimate the effect of donor type on patient and graft survival. A robust standard  
33 error was used to allow for the clustering on the pairs. The estimates were then combined using  
34 Rubin's rules to provide adjusted hazard ratios and their 95% CI.  
35  
36  
37  
38  
39  
40  
41  
42  
43  
44  
45  
46

47 In addition to the donor, recipient and operative characteristics presented in Table 1 and 2, we also  
48 considered the following characteristics as candidates for inclusion in the propensity score model (all  
49 are yes/no unless otherwise stated): lifestyle activity score on 5-point scale, liver failure grade  
50 (acute/not acute), encephalopathy grade on 5-point scale, oesophageal varices, diuretic therapy,  
51 pyrexia, sepsis, haemoglobin, white cell count, platelet count, serum urea, anti-CMV status, and anti-  
52 HCV status. Types of biliary and hepatic arterial anastomoses were also considered as was the use of  
53 anti-fibrinolytic therapy.  
54  
55  
56  
57  
58  
59  
60

**Missing values**

All model factors had missing values for less than 5% of patients with the exception of donor history of diabetes (7%), donor organ appearance (19%). Multiple imputation using chained equations was used to fill in missing values for donor diabetes history and donor organ appearance but not the DCD donor post-withdrawal times. The imputation model included the model factors above, type of donor, as well as terms representing the outcome (log of survival time and the censoring indicator) (25). We created 10 imputed data sets and the model parameters based on these datasets were combined using Rubin's rules.

For peer review only

## Results

We identified 2572 first elective adult liver transplants. Of these, 352 (14%) had a graft from a DCD donor. Use of livers from DCD donors progressively increased from 6.9% in 2005 to 26.3% in 2010, an almost four-fold rise over that time period. Two centres used DCD donor livers in more than 30% of first elective adult liver transplants in 2010.

### Donor, recipient, and operative characteristics

Compared to DBD liver donors, DCD donors were younger, had lower BMIs, lower serum sodium concentrations, and were more likely to be male (Table 1). Although a similar proportion of organs appeared normal in the two groups, DCD donors had a higher proportion of missing values (29%) than DBD donors (18%). The cause of death for DBD donors was predominantly stroke (70%), whereas the corresponding proportion in the DCD group was 49%. Trauma was more common in DCD donors (23%) than in DBD donors (11%). In 352 DCD donors, the median (interquartile range) time from withdrawal of life-support to cardiac arrest was 15 (11 to 20) minutes whereas the median duration from cardiac arrest to cold perfusion was 12 (9 to 14) minutes.

Recipients of a DCD liver were more likely to be older, male, have lower serum bilirubin concentration, and cancer as the primary liver disease (Table 2). Both UKELD and MELD scores were lower in recipients of DCD livers, most probably because a higher proportion of DCD recipients had cancer as their primary disease. DCD livers were more likely to be used as whole rather than partial grafts. Median graft CIT was significantly lower for DCD livers, and there were more ethnicity mismatches in this group.

### Graft and patient survival

Graft loss was higher in DCD recipients (Figure 1), with a three-year graft loss (95% CI) of 27.3% (21.8 to 33.9) for DCD recipients and 18.2% (16.4 to 20.2) for DBD recipients with an unadjusted HR of 1.6 (1.2 to 2.0) (Table 3). Recipient mortality was also increased with DCD livers (Figure 1). Three-year mortality was 14.1% (12.5 to 16.0) for DBD recipients and 19.4% (14.5 to 25.6) for DCD recipients with an unadjusted mortality HR of 1.4 (1.1 to 2.0) for use of a DCD donor liver.

After adjustment using the multivariable Cox regression model, we found that the risk of graft loss within three years of transplantation in recipients of a DCD donor liver was more than twice that of those receiving a DBD liver: adjusted HR 2.3 (1.7 to 3.0). Adjusted three-year patient mortality was also significantly higher in recipients of livers from DCD donors: adjusted HR 2.0 (1.4 to 2.8) (Table 3).

1  
2  
3 After adjustment using the propensity score analysis, use of a liver from a DCD donor was associated  
4 with an adjusted HR of 2.3 (1.3 to 4.1) for graft loss. The adjusted HR for recipient mortality was 2.0  
5 (1.0 to 4.2) (Table 3).  
6  
7

### 8 9 **Centre-specific estimates of DCD risk**

10 Although the interaction between donor type and centre was not statistically significant for either graft  
11 loss ( $p = 0.08$ ) or recipient mortality ( $p = 0.24$ ), the relative impact of using DCD livers on graft loss  
12 and recipient mortality seemed to vary among the seven transplant centres. Centre-specific adjusted  
13 HRs for graft loss and recipient mortality varied from being smaller than 1 to larger than 4 (Figure 2).  
14  
15  
16

### 17 18 **Causes of graft loss**

19 When causes of graft loss were analysed over three years post-transplantation, the rates of biliary  
20 causes of graft loss were higher in livers from DCD donors (4/72 (6%)) than DBD donors (4/330  
21 (1%)) ( $p = 0.04$ ). Rates of biliary stricture requiring intervention were very similar between the two  
22 groups (DCD donors 13/347 (4%) versus DBD donors 81/2193 (4%)) ( $p = 0.96$ ).  
23  
24  
25  
26  
27  
28  
29  
30  
31  
32  
33  
34  
35  
36  
37  
38  
39  
40  
41  
42  
43  
44  
45  
46  
47  
48  
49  
50  
51  
52  
53  
54  
55  
56  
57  
58  
59  
60

## Discussion

Recipients of DCD livers, after risk-adjustment, have approximately twice the risk of graft loss and death within 3 years of transplantation than recipients of livers from DBD donors. This is the first study that has analysed risk-adjusted outcomes in recipients of livers from DCD donors outside of the US. Although US-based studies have reported on larger numbers of DCD liver transplant recipients (6, 7, 9, 13), rates of DCD liver usage in the UK are more than double those of the US (3, 14).

Our results contrast with single-centre reports that demonstrate good short-term results with liver transplantation from DCD donors (12, 26), with graft loss and patient mortality similar to those from DBD donors (27-29). However, it is important to note that we found that the impact of using DCD livers on graft loss and recipient mortality seemed to differ among the seven UK transplant centres, although these differences did not reach statistical significance. This finding indicates that it is important to investigate centre-specific practices that may impact on the outcomes of transplantation of DCD livers, including the selection of DCD grafts, definition of warm ischemic limits, and procurement and implantation techniques.

Risk factors for graft loss and patient mortality are unevenly distributed between DBD and DCD donors and recipients. For example, partial organs were more often used for DBD recipients than for DCD recipients. However, risk adjustment or matching techniques (30) are therefore crucial for a valid comparison of outcomes. Because estimates from multivariable models can be less robust when many factors are included, we also used propensity score matching. Reassuringly, both risk-adjustment techniques gave similar HRs for graft loss and recipient death.

In the UK, DCD liver donors are marginally older and have longer times from withdrawal of life-sustaining treatment to cold perfusion than in the US (6, 7, 9, 13, 14, 31). These differences are likely to reflect a wider acceptance of transplantation of DCD livers in the UK and that treatment withdrawal in the UK takes place in the intensive care unit or the anaesthetic room but not in theatre itself. However, cold ischaemic times are shorter for DCD livers in the UK, even taking into account differences in definitions between the two countries (6, 7, 13, 32). This may be due to geographical differences between the two countries (i.e. longer distances between procuring and implanting centres), or an increased willingness on the part of UK surgeons to begin the recipient operation before the organ arrives at the implanting centre.

Transplanted livers from DCD donors appear particularly susceptible to biliary complications, most commonly ischaemic cholangiopathy, which is thought to occur as a result of warm ischaemic

1  
2  
3 damage to the biliary epithelium sustained during the procurement process (10, 33-36). We examined  
4 rates of graft loss from biliary causes and found that this was a relatively rare cause of graft loss in  
5 DCD as well as in DBD recipients. In addition, there was no difference in the proportion of DCD and  
6 DBD recipients who required an intervention for biliary strictures. Although these findings concur  
7 with previous reports suggesting that ischaemic cholangiopathy is not a major problem in UK  
8 recipients of livers from DCD donors (26, 27), it should be recognised that analyses of national  
9 registry data are prone to under-reporting of post-operative complications.  
10  
11  
12  
13

14  
15 Unfortunately, data on time from withdrawal of life-sustaining treatment to cardiac arrest were  
16 missing in more than 50% of DCD donors, and therefore the impact of this variable on outcome was  
17 not assessed. Prolonged time from cardiac arrest to cold perfusion has been shown to be a risk factor  
18 for the development of ischaemic cholangiopathy (35), and would therefore be expected to lead to  
19 decreased graft survival. We found no significant association (data not shown). This is again likely to  
20 be due to lack of power or to most DCD donors having similar times, with an interquartile range of  
21 just 5 hours.  
22  
23  
24  
25

26  
27 Defining acceptable warm ischaemic limits for livers from DCD donors is hampered by the lack of  
28 data on donor cardiorespiratory parameters after treatment withdrawal. Some controlled DCD donors  
29 have prolonged periods of cardiorespiratory stability before dying rapidly. It is therefore possible that  
30 the duration of hypotension or hypoxia has a greater impact on subsequent graft viability than the  
31 duration from treatment withdrawal to cardiac arrest or cold perfusion (8, 37). National prospective  
32 data collection of post-withdrawal cardiorespiratory parameters in Maastricht III DCD donors has  
33 therefore been initiated in both the UK and the US (8). Further research is also required into the  
34 impact of procurement techniques and preservation fluids on graft function (38), and the emerging  
35 role of machine perfusion (29).  
36  
37  
38  
39  
40  
41

42  
43 The allocation of deceased donor livers in the UK is currently on a local basis, with national organ  
44 sharing only for those patients with acute liver failure reaching specific criteria (20). Although local  
45 allocation reduces cold ischaemic time, which is an important risk factor for graft survival, the current  
46 system raises issues of equity of access to a national resource. The ultimate aim of our analyses of  
47 national data is to inform discussions on how best to utilise this resource (40). For example, one could  
48 use our results as further support for not using livers from DCD donors for patients with a low risk of  
49 death on the waiting list as these recipients are able to wait for a graft that is more likely to have a  
50 favourable long-term outcome. An exception could be made for patients with HCC. Although, these  
51 patients generally have low UKELD scores – indicating a low risk of mortality on the waiting list –  
52 they have a high risk of disease progression, which is an additional argument to use livers from DCD  
53 donors for this group.  
54  
55  
56  
57  
58  
59  
60

1  
2  
3  
4 The relative benefit associated with transplantation of a DCD versus a DBD donor liver is expected to  
5 be dependent not only on donor and recipient factors, but also on the overall availability of donor  
6 livers within each region or country, the rate of deaths on the waiting list, and the impact of DCD  
7 transplantation on the subsequent need for re-transplantation (41). Allocation policies also need to  
8 determine whether DCD organs are to be distributed on the basis of utility, urgency, or overall  
9 survival benefit (42). Although livers transplanted from DCD donors have inferior outcomes to those  
10 from DBD donors, they remain a valuable additional source of grafts, especially in countries with  
11 relatively low rates of DBD organ donation.  
12  
13  
14  
15  
16  
17  
18  
19  
20  
21  
22  
23  
24  
25  
26  
27  
28  
29  
30  
31  
32  
33  
34  
35  
36  
37  
38  
39  
40  
41  
42  
43  
44  
45  
46  
47  
48  
49  
50  
51  
52  
53  
54  
55  
56  
57  
58  
59  
60



## Conflict of interest

None

## Contributorship

CJC, AEG, SCC and JvdM designed the study. SCC analysed the data. All authors contributed to the interpretation of the results. CJC wrote the first draft supported by SSC and JvdM; All authors commented on later drafts. JvdM is guarantor.

## Acknowledgements

The authors would like to thank all seven UK liver transplant centres for providing data to the UK Liver Transplant Audit. We would also like to thank all those involved in collecting and handling liver transplant data at the National Health Service Blood and Transplant authority, and Kerri Barber, lead liver transplant statistician at the authority.

## Funding

Supported by the NHS National Specialised Commissioning Group.

## References

- (1) Kootstra G, Daemen JH, Oomen AP. Categories of non-heart-beating donors. *Transplantation proceedings*. 1995 Oct;27(5):2893-4.
- (2) Jimenez-Galanes S, Meneu-Diaz MJ, Elola-Olaso AM, et al. Liver transplantation using uncontrolled non-heart-beating donors under normothermic extracorporeal membrane oxygenation. *Liver Transpl*. 2009 Sep;15(9):1110-8.
- (3) Thuluvath PJ, Guidinger MK, Fung JJ, Johnson LB, Rayhill SC, Pelletier SJ. Liver transplantation in the United States, 1999-2008. *Am J Transplant*. 2010 Apr;10(4 Pt 2):1003-19.
- (4) Dominguez-Gil B, Haase-Kromwijk B, Van Leiden H, et al. Current situation of donation after circulatory death in European countries. *Transpl Int*. 2011 Jul;24(7):676-86.
- (5) Abt PL, Desai NM, Crawford MD, et al. Survival following liver transplantation from non-heart-beating donors. *Ann Surg*. 2004 Jan;239(1):87-92.
- (6) Mateo R, Cho Y, Singh G, et al. Risk factors for graft survival after liver transplantation from donation after cardiac death donors: an analysis of OPTN/UNOS data. *Am J Transplant*. 2006 Apr;6(4):791-6.
- (7) Lee KW, Simpkins CE, Montgomery RA, Locke JE, Segev DL, Maley WR. Factors affecting graft survival after liver transplantation from donation after cardiac death donors. *Transplantation*. 2006 Dec 27;82(12):1683-8.
- (8) Mathur AK, Heimbach J, Steffick DE, Sonnenday CJ, Goodrich NP, Merion RM. Donation after cardiac death liver transplantation: predictors of outcome. *Am J Transplant*. 2010 Nov;10(11):2512-9.
- (9) Jay C, Skaro A, Ladner D, et al. A comprehensive risk assessment of mortality following donation after cardiac death liver transplant - An analysis of the national registry. *J Hepatol*. 2011;44(4):808-13.
- (10) Jay CL, Lyuksemburg V, Ladner DP, et al. Ischemic cholangiopathy after controlled donation after cardiac death liver transplantation: a meta-analysis. *Ann Surg*. 2011 Feb;253(2):259-64.
- (11) Renz JF. Is DCD for liver transplantation DNR? *Am J Transplant*. 2008 Mar;8(3):485-8.
- (12) Muiesan P, Girlanda R, Jassem W, et al. Single-center experience with liver transplantation from controlled non-heartbeating donors: a viable source of grafts. *Ann Surg*. 2005 Nov;242(5):732-8.
- (13) Merion RM, Pelletier SJ, Goodrich N, Englesbe MJ, Delmonico FL. Donation after cardiac death as a strategy to increase deceased donor liver availability. *Ann Surg*. 2006 Oct;244(4):555-62.
- (14) NHS Blood and Transplant. *Transplant activity in the UK; 2008*.
- (15) <http://www.rcseng.ac.uk/surgeons/research/surgical-research/docs/uk-liver-transplant-audit-report-2011>. Accessed 14 August 2012.

- 1  
2  
3 (16) Hartley P, Petruckevitch A, Reeves B, Rolles K. The National Liver Transplantation audit: an  
4 overview of patients presenting for liver transplantation from 1994 to 1998. On behalf of the Steering  
5 Group of the UK Liver Transplantation Audit. *Br J Surg*. 2001 Jan;88(1):52-8.
- 6  
7 (17) Jacob M, Copley LP, Lewsey JD, et al. Pretransplant MELD score and post liver  
8 transplantation survival in the UK and Ireland. *Liver Transpl*. 2004 Jul;10(7):903-7.
- 9  
10 (18) van der Meulen JH, Jacob M, Copley L. Assessing the quality of the data in a transplant  
11 registry: the European Liver Transplant Registry. *Transplantation*. 2003 Jun 27;75(12):2164-7.
- 12  
13 (19) Reich DJ, Mulligan DC, Abt PL, et al. ASTS recommended practice guidelines for controlled  
14 donation after cardiac death organ procurement and transplantation. *Am J Transplant*. 2009  
15 Sep;9(9):2004-11.
- 16  
17 (20) Neuberger J, Gimson A, Davies M, et al. Selection of patients for liver transplantation and  
18 allocation of donated livers in the UK. *Gut*. 2008 Feb;57(2):252-7.
- 19  
20 (21) Barber K, Madden S, Allen J, Collett D, Neuberger J, Gimson A. Elective liver transplant list  
21 mortality: Development of a United Kingdom End-Stage Liver Disease score. *Transplantation*. 2011  
22 Jul 19;92(4):469-76.
- 23  
24 (22) Kamath PS, Wiesner RH, Malinchoc M, et al. A model to predict survival in patients with  
25 end-stage liver disease. *Hepatology*. 2001 Feb;33(2):464-70.
- 26  
27 (23) Rosenbaum PR, Rubin DB. Reducing bias in observational studies using subclassification on  
28 the the propensity score. *J Am Stat Assoc* 1984;79:516-24.
- 29  
30 (24) Austin PC, Mamdani MM. A comparison of propensity score methods: a case-study  
31 estimating the effectiveness of post-AMI statin use. *Stat Med*. 2006 Jun 30;25(12):2084-106.
- 32  
33 (25) White IR, Royston P, Wood AM. Multiple imputation using chained equations: Issues and  
34 guidance for practice. *Stat Med*. 2011 Feb 20;30(4):377-99.
- 35  
36 (26) Tariciotti L, Rocha C, Perera MT, et al. Is it time to extend liver acceptance criteria for  
37 controlled donors after cardiac death? *Transplantation*. 2011 Nov 27;92(10):1140-6.
- 38  
39 (27) Deoliveira ML, Jassem W, Valente R, et al. Biliary complications after liver transplantation  
40 using grafts from donors after cardiac death: results from a matched control study in a single large  
41 volume center. *Ann Surg*. 2011 Nov;254(5):716-23.
- 42  
43 (28) Mallik M, Callaghan CJ, Hope M, et al. Comparison of liver transplantation outcomes from  
44 adult split liver and circulatory death donors. *Br J Surg*. 2012 Jun;99(6):839-47.
- 45  
46 (29) Grewal HP, Willingham DL, Nguyen J, et al. Liver transplantation using controlled donation  
47 after cardiac death donors: an analysis of a large single-center experience. *Liver Transpl*. 2009  
48 Sep;15(9):1028-35.
- 49  
50 (30) Pine JK, Aldouri A, Young AL, et al. Liver transplantation following donation after cardiac  
51 death: an analysis using matched pairs. *Liver Transpl*. 2009 Sep;15(9):1072-82.
- 52  
53 (31) Feng S, Goodrich NP, Bragg-Gresham JL, et al. Characteristics associated with liver graft  
54 failure: the concept of a donor risk index. *Am J Transplant*. 2006 Apr;6(4):783-90.
- 55  
56  
57  
58  
59  
60

- 1  
2  
3  
4 (32) Berg CL, Steffick DE, Edwards EB, et al. Liver and intestine transplantation in the United  
5 States 1998-2007. *Am J Transplant*. 2009 Apr;9(4 Pt 2):907-31.  
6  
7 (33) Abt P, Crawford M, Desai N, Markmann J, Olthoff K, Shaked A. Liver transplantation from  
8 controlled non-heart-beating donors: an increased incidence of biliary complications. *Transplantation*.  
9 2003 May 27;75(10):1659-63.  
10  
11 (34) Foley DP, Fernandez LA, Levenson G, et al. Biliary complications after liver transplantation  
12 from donation after cardiac death donors: an analysis of risk factors and long-term outcomes from a  
13 single center. *Ann Surg*. 2011 Apr;253(4):817-25.  
14  
15 (35) Taner CB, Bulatao IG, Willingham DL, et al. Events in procurement as risk factors for  
16 ischemic cholangiopathy in liver transplantation using donation after cardiac death donors. *Liver*  
17 *Transpl*. 2011 Aug 11.  
18  
19 (36) Chan EY, Olson LC, Kisthard JA, et al. Ischemic cholangiopathy following liver  
20 transplantation from donation after cardiac death donors. *Liver Transpl*. 2008 May;14(5):604-10.  
21  
22 (37) Ho KJ, Owens CD, Johnson SR, et al. Donor postextubation hypotension and age correlate  
23 with outcome after donation after cardiac death transplantation. *Transplantation*. 2008 Jun  
24 15;85(11):1588-94.  
25  
26 (38) Brockmann JG, Vaidya A, Reddy S, Friend PJ. Retrieval of abdominal organs for  
27 transplantation. *Br J Surg*. 2006 Feb;93(2):133-46.  
28  
29 (39) de Rougemont O, Breitenstein S, Leskosek B, et al. One hour hypothermic oxygenated  
30 perfusion (HOPE) protects nonviable liver allografts donated after cardiac death. *Ann Surg*. 2009  
31 Nov;250(5):674-83.  
32  
33 (40) Morris PJ, Johnson RJ, Fuggle SV, Belger MA, Briggs JD. Analysis of factors that affect  
34 outcome of primary cadaveric renal transplantation in the UK. HLA Task Force of the Kidney  
35 Advisory Group of the United Kingdom Transplant Support Service Authority (UKTSSA). *Lancet*.  
36 1999 Oct 2;354(9185):1147-52.  
37  
38 (41) Selck FW, Grossman EB, Ratner LE, Renz JF. Utilization, outcomes, and retransplantation of  
39 liver allografts from donation after cardiac death: implications for further expansion of the deceased-  
40 donor pool. *Ann Surg*. 2008 Oct;248(4):599-607.  
41  
42 (42) Merion RM, Sharma P, Mathur AK, Schaubel DE. Evidence-based development of liver  
43 allocation: a review. *Transpl Int*. 2011 Oct;24(10):965-72.  
44  
45  
46  
47  
48  
49  
50  
51  
52  
53  
54  
55  
56  
57  
58  
59  
60

**Figure 1** - Graft survival after first elective adult liver transplantation using livers from donation after circulatory death (DCD) donors and donation after brain death (DBD) donors.

**Graft failure**

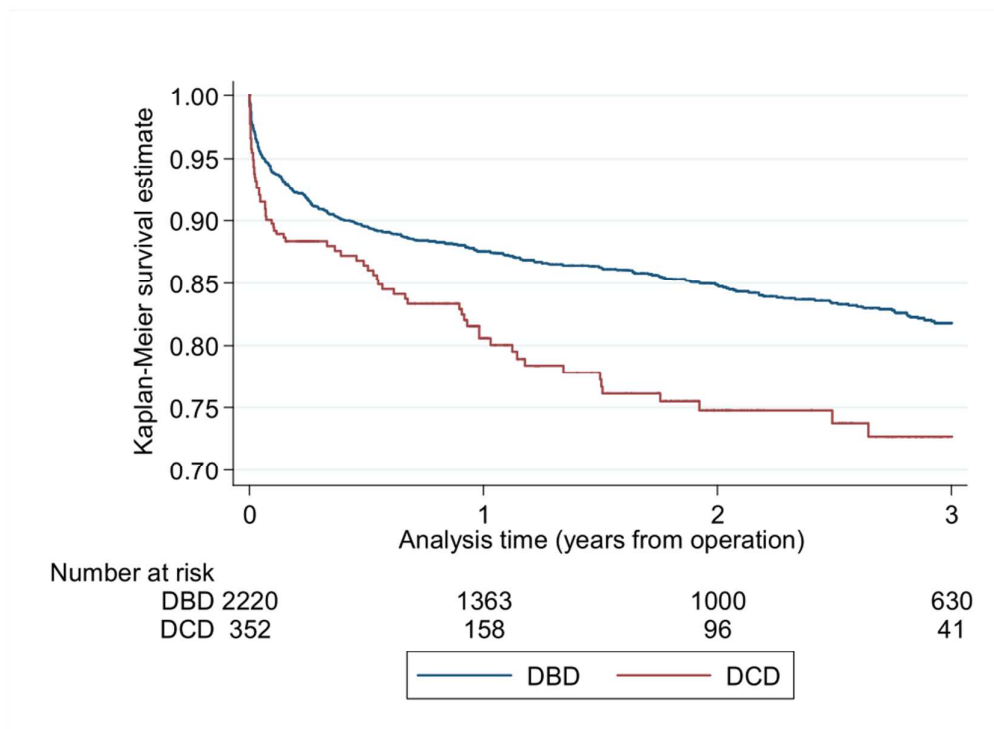

**Recipient mortality**

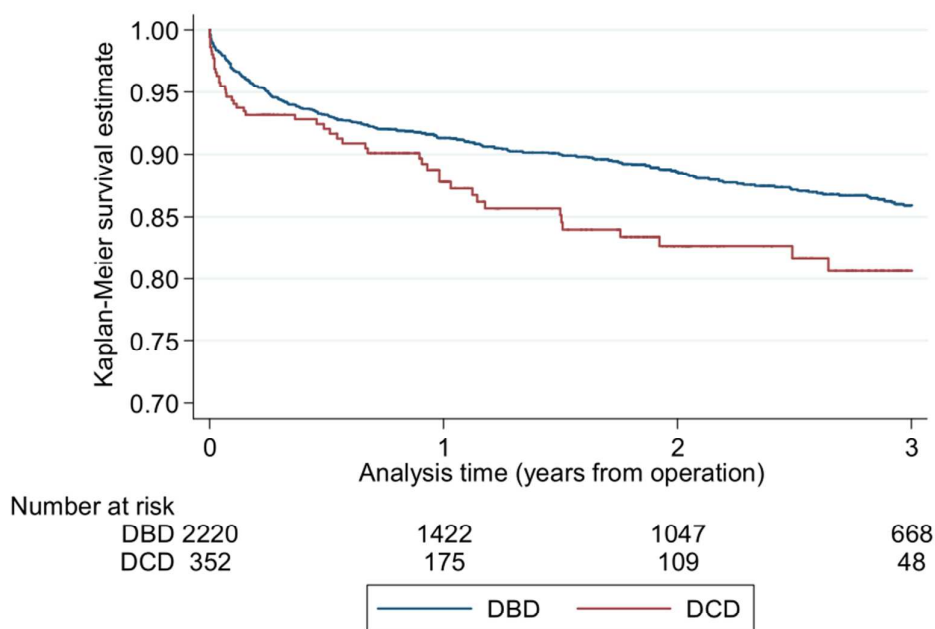

**Figure 2** - Centre specific hazard ratios (HR) and 95% CI comparing three-year graft loss (top figure) and recipient mortality (bottom figure). HRs greater than 1 indicate that risks of loss or mortality are greater with DCD than with DBD livers.

### Graft failure

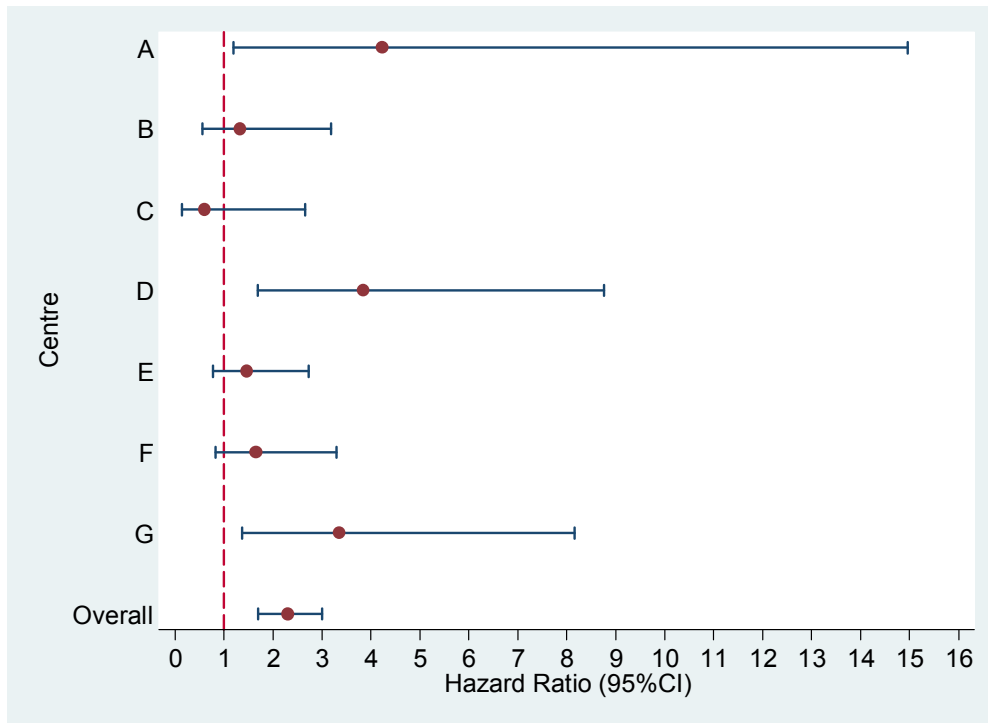

### Recipient mortality

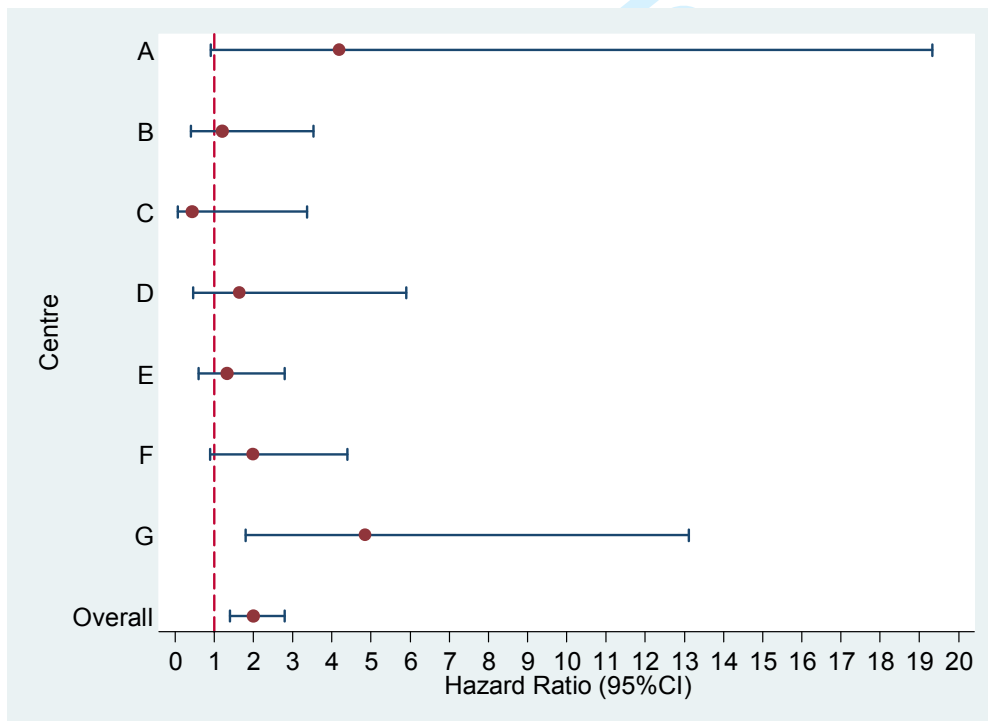

**Table 1** - Donor characteristics by donor type.

| <b>Liver donor type</b>     | DCD (n=352)      | DBD (n=2,220)    | p-value | Missing (n) |
|-----------------------------|------------------|------------------|---------|-------------|
| <b>Donor characteristic</b> |                  |                  |         |             |
| Age, years                  | 42 (16)          | 46 (15)          | <0.01   | 0           |
| Male sex                    | 206 (59)         | 1,158 (52)       | 0.03    | 0           |
| BMI, kg/m <sup>2</sup>      | 25 (4)           | 26 (7)           | <0.01   | 20          |
| Serum sodium, mmol/L        | 144 (140 to 150) | 147 (142 to 154) | <0.01   | 4           |
| Diabetes                    | 14 (5)           | 111 (5)          | 0.93    | 154         |
| Organ appearance            |                  |                  |         |             |
| Healthy                     | 176 (70)         | 1,384 (76)       | 0.05    | 497         |
| Suboptimal                  | 75 (30)          | 440 (24)         |         |             |
| Cause of death              |                  |                  |         |             |
| Trauma                      | 81 (23)          | 256 (12)         | <0.01   | 23          |
| Stroke                      | 173 (50)         | 1,546 (70)       |         |             |
| Anoxia                      | 54 (16)          | 198 (9)          |         |             |
| Other                       | 37 (11)          | 204 (9)          |         |             |

Values are numbers (percentages) for categorical variables and means (standard deviations) or median (interquartile range) otherwise. DBD - donation after brain death; DCD - donation after circulatory death.

**Table 2** - Recipient and operative characteristics by donor type.

| <b>Liver donor type</b>                        | DCD (n=352)      | DBD (n=2,220)    | p-value | Missing (n) |
|------------------------------------------------|------------------|------------------|---------|-------------|
| <b>Recipient and operative characteristics</b> |                  |                  |         |             |
| Age, years                                     | 53(9)            | 52 (11)          | 0.02    | 0           |
| Male sex                                       | 247 (70)         | 1,436 (65)       | 0.04    | 0           |
| BMI, kg/m <sup>2</sup>                         | 27(5)            | 27 (6)           | 0.94    | 12          |
| Serum sodium, mmol/L                           | 137 (134 to 140) | 137 (134 to 140) | 0.38    | 7           |
| Serum potassium, mmol/L                        | 4.2 (0.5)        | 4.2 (0.5)        | 0.23    | 52          |
| Serum creatinine, $\mu$ mol/L                  | 89 (72 to 109)   | 86(72 to 104)    | 0.92    | 4           |
| Serum albumin, g/L                             | 32 (28 to 37)    | 32 (27 to 36)    | 0.40    | 14          |
| Serum bilirubin, mmol/L                        | 41(21 to 79)     | 47 (24 to 100)   | <0.01   | 8           |
| INR                                            | 1.4 (1.2 to 1.6) | 1.4 (1.2 to 1.6) | 0.90    | 54          |
| UKELD score                                    | 54 (50 to 57)    | 55 (51 to 59)    | <0.01   | 57          |
| MELD score                                     | 15 (11 to 19)    | 15 (12 to 20)    | 0.04    | 57          |
| <b>Primary liver disease</b>                   |                  |                  |         |             |
| Cancer                                         | 118 (33)         | 461 (21)         | <0.01   | 0           |
| HCV                                            | 47 (13)          | 265 (12)         |         |             |
| PSC                                            | 23 (7)           | 233 (10)         |         |             |
| HBV                                            | 6 (2)            | 52 (2)           |         |             |
| PBC                                            | 34 (10)          | 238 (11)         |         |             |
| ALD                                            | 71 (20)          | 516 (23)         |         |             |
| AID                                            | 22 (6)           | 193 (9)          |         |             |
| Metabolic                                      | 15 (4)           | 86 (4)           |         |             |
| Other                                          | 16 (5)           | 176 (8)          |         |             |
| <b>Previous abdominal surgery</b>              |                  |                  |         |             |
| No                                             | 315 (90)         | 1,931 (87)       | 0.15    | 10          |
| Yes                                            | 35 (10)          | 281 (13)         |         |             |
| <b>Inpatient &amp; ventilatory status</b>      |                  |                  |         |             |
| Outpatient                                     | 313 (89)         | 1,877 (85)       | 0.10    | 0           |
| Inpatient, not ventilated                      | 36(10)           | 322 (14)         |         |             |
| Ventilated                                     | 3 (1)            | 21 (1)           |         |             |
| Days in intensive care                         | 2 (1,4)          | 2 (1,4)          | 0.38    | 15          |
| <b>Pre-operative renal support</b>             |                  |                  |         |             |
| No                                             | 333 (95)         | 2,116 (96)       | 0.71    | 7           |
| Yes                                            | 18 (5)           | 98 (4)           |         |             |



|    |                            |                  |                   |       |    |
|----|----------------------------|------------------|-------------------|-------|----|
| 1  | Organ type                 |                  |                   |       |    |
| 2  | Whole                      | 343 (97)         | 1,956 (88)        | <0.01 | 1  |
| 3  |                            |                  |                   |       |    |
| 4  | Partial                    | 9 (3)            | 263 (12)          |       |    |
| 5  | Cold ischaemic time, hours | 6.7 (5.6 to 8.0) | 9.5 (7.8 to 11.1) | <0.01 | 93 |
| 6  |                            |                  |                   |       |    |
| 7  | Anastomosis time, mins     | 41 (35 to 50)    | 42 (36 to 51)     | 0.42  | 90 |
| 8  |                            |                  |                   |       |    |
| 9  | Ethnicity mismatch         |                  |                   |       |    |
| 10 | No                         | 272 (77)         | 1,868 (84)        | <0.01 | 10 |
| 11 | Yes                        | 79 (22)          | 343 (15)          |       |    |
| 12 |                            |                  |                   |       |    |

14 Values are numbers (percentages) for categorical variables and means (standard deviations) or median  
 15 (interquartile range) otherwise. DBD - donation after brain death; DCD - donation after circulatory death; HCV  
 16 – hepatitis C virus; PSC – primary sclerosing cholangitis; HBV – hepatitis B virus; PBC – primary biliary  
 17 cirrhosis; ALD – alcoholic liver disease; AID – autoimmune disease.

**Table 3** - Recipient 3-year graft loss and mortality by donor type. Hazard ratios (HR) are unadjusted or adjusted based on either a multivariable Cox regression model or propensity score matching.

| Liver donor type                    | Unadjusted HR<br>(95% CI) | Adjusted HR (95% CI)   |                              |                  |
|-------------------------------------|---------------------------|------------------------|------------------------------|------------------|
|                                     |                           | Multivariable<br>model | Propensity score<br>analysis |                  |
| <b>3-year graft loss %</b>          |                           |                        |                              |                  |
| (95% CI)                            |                           |                        |                              |                  |
| Donation after<br>circulatory death | 27.3 (21.8 to 33.9)       | 1.6 (1.2 to 2.0)       | 2.3 (1.7 to 3.0)             | 2.3 (1.3 to 4.1) |
| Donation after<br>brain death       | 18.2 (16.4 to 20.2)       | 1                      | 1                            | 1                |
| <b>3-year mortality %</b>           |                           |                        |                              |                  |
| (95% CI)                            |                           |                        |                              |                  |
| Donation after<br>circulatory death | 19.4 (14.5 to 25.6)       | 1.4 (1.1 to 2.0)       | 2.0 (1.4 to 2.8)             | 2.0 (1.0 to 4.2) |
| Donation after<br>brain death       | 14.1 (12.5 to 16.0)       | 1                      | 1                            | 1                |
